# Supplementary material
Source: publisher figshare collection journal article supplement (https://rs.figshare.com/ndownloader/files/12945704)
Supplement: Supplementary file 1 [file 12945704]

Anonymized_ID	Semester	Orderliness_Shower	Orderliness_Meal	Diligence_Library	Diligence_Water	GPA
1	1	-0.802588237	-0.769577444	0.822841053	-0.470628202	-1.539845513
1	2	-0.965229488	-0.90700975	0.530506048	-0.618077761	-1.599570625
1	3	-0.354784575	-1.390031341	-0.117621728	-0.490568428	-1.539845513
1	4	-0.610291405	-0.539576067	-0.591359991	-0.525909915	-1.480120401
1	5	-0.858261732	0.186133637	-0.598800294	-0.704474534	-1.539845513
1	6	-1.235427532	1.245361008	-0.522741485	-0.661379594	-1.539845513
2	1		0.74447462	-0.968437594	1.614063785	0.849158957
2	2	0.376926085	1.001771709	-0.788180414	0.196661106	1.386684962
2	3		1.056278049	-0.843372815	0.037560924	0.849158957
2	4		-0.381833844	-0.716767228	-0.388244263	0.132457616
2	5	-1.1640105	0.327112476	-0.760122736	-0.422406821	0.96860918
2	6	-0.724768386	0.985282236	-0.654850444	0.875297623	0.908884068
3	1	-0.970179932	-0.362350678	0.652243087	-0.405481577	1.386684962
3	2	-0.209176578	-0.776964069	1.263109639	-0.094317061	0.789433845
3	3	-0.325287976	-1.667360787	0.462979142	-0.402546869	0.908884068
3	4	-0.842543791	-0.495942077	1.760025713	-0.46691035	-0.643968837
3	5	0.060963316	0.266343268	0.668733175	-0.462702209	1.326959851
3	6	-0.599530626	-0.198440249	-0.236505407	-0.661379594	1.267234739
4	1	-1.626268917	0.791063256	0.822841053	-0.340334953	-0.942594396
4	2	-0.750201604	0.45203984	0.786917305	1.360573773	0.490808286
4	3	-0.34161876	0.240617668	1.914481317	0.609701054	-0.046717719
4	4	-1.240105458	0.097961522	1.477859428	-0.407910785	-0.106442831
4	5	-1.268122352	0.852050738	1.083562311	0.584977867	-0.823144172
4	6	-1.355591997	0.250512748	0.137803311	2.411974841	-0.464793502
5	1	1.717394598	0.936090915	3.253862074	-0.275188328	0.789433845
5	2	0.214624701	0.217570315	1.226479459	0.720421806	1.446410074
5	3	-0.696895558	-0.331025582	0.898429794	-0.446557648	1.506135186
5	4	-1.632123611	0.089907041	1.571914856	0.339417037	1.267234739
5	5	-0.705263398	-0.73192126	1.060516248	0.22231938	1.446410074
5	6	0.044789196	-0.043089122	0.31394859	-0.604465623	1.625585409
6	1		0.104480604	-0.968437594	-0.535774826	0.132457616
6	2	0.988180951	-0.166399186	-0.788180414	-0.559882128	-0.345343278
6	3		-1.678913915	-0.843372815	-0.490568428	-0.524518613
6	4	-0.647935102	-1.097349035	-0.716767228	-0.525909915	-0.703693949
6	5		-0.30522429	-0.760122736	-0.785065309	-1.241219954
6	6		-0.435212167	-0.654850444	-0.604465623	-0.643968837
7	1	0.645149219	0.110450667	-0.968437594	-0.275188328	-1.181494843
7	2		-0.180431368	-0.788180414	-0.559882128	-0.40506839
7	3		-0.132085151	-0.843372815	-0.226503752	-0.643968837
7	4		-0.32795682	-0.716767228	0.772080513	-0.584243725
7	5		-0.357032331	-0.760122736	0.423796317	-0.524518613
7	6		0.740678173	-0.654850444	0.192329971	-0.046717719
8	1	-0.427023373	-0.886849492	3.552408515	-0.535774826	1.267234739
8	2	-1.72083438	-0.542764849	1.739301972	-0.327099594	0.96860918
8	3	-1.324727261	0.856930333	0.753279577	-0.512573817	0.013007392
8	4	-1.242849669	0.655631833	0.474601528	-0.525909915	-1.062044619
8	5	-0.683217457	-0.340660003	0.000397346	-0.785065309	-0.643968837
8	6	0.245152685	0.02910209	-0.566777805	-0.661379594	0.431083174
9	1	-0.151200698	1.139370979	0.609593595	1.223184038	0.908884068
9	2	-0.91149692	0.610404247	1.775932152	0.138465473	0.61025851
9	3	-0.21509485	-0.926120653	0.850046389	0.367641768	0.669983621
9	4	-0.023538437	0.106825376	-0.152434659	-0.329244698	0.908884068
9	5	0.004675353	0.162280928	0.783963491	-0.180634496	0.013007392
9	6		1.254771905	-0.170450927	-0.661379594	-0.524518613
10	1	0.088939146	0.137687884	1.249335969	-0.535774826	-1.121769731
10	2	0.795517542	-0.096466522	0.090943894	-0.618077761	-0.225893055
10	3	0.413647803	-1.043623227	-0.262771945	-0.512573817	-1.002319507
10	4	1.045525878	-0.281693721	-0.716767228	-0.525909915	-0.225893055
10	5	0.053948666	-0.014384236	-0.760122736	-0.785065309	-1.002319507
10	6	-0.021760437	0.727458729	-0.654850444	-0.661379594	-1.121769731
11	1	0.496808335	1.50154444	0.908140036	0.376277918	1.565860298
11	2	-0.279002684	0.809602538	0.860177664	-0.501686495	1.147784515
11	3	1.284201395	0.607276918	1.188730229	-0.380541479	1.685310521
11	4	0.522590866	0.227544849	4.42492951	-0.211245569	1.326959851
11	5	-0.197208917	1.236026525	2.097589087	-0.462702209	1.028334292
11	6	0.445743883	1.337620169	2.846036974	-0.661379594	1.506135186
12	1	-1.712703101	-0.778079174	0.652243087	-0.210041703	-0.643968837
12	2	-1.406244435	-0.3695224	0.530506048	0.254856739	0.013007392
12	3	-1.273402075	-0.433251776	0.269445519	-0.380541479	-0.225893055
12	4	-1.489489094	-1.257013818	-0.152434659	-0.486576871	-0.76341906
12	5	-0.760917383	-1.149101032	0.184765851	-0.623883759	-0.882869284
12	6	-0.342481708	-0.60629012	-0.192469087	-0.661379594	-0.225893055
13	1	0.135137945	-1.465086806	-0.968437594	0.180838044	0.490808286
13	2	-0.832473206	-1.380330712	-0.788180414	0.080269839	-0.285618166
13	3	-0.179397503	-2.379448694	-0.843372815	1.005798068	0.490808286
13	4	0.059511824	-1.671884165	-0.716767228	-0.053913396	0.192182727
13	5	0.544283316	-1.140791909	-0.760122736	0.302910155	0.192182727
13	6	-0.248202523	-1.170039961	-0.654850444	0.761469681	0.311632951
14	1	0.40873703	-1.067645942	2.102325801	-0.01460183	1.326959851
14	2	2.090339415	-0.251761712	2.471905563	2.524486441	1.625585409
14	3	1.172076058	0.352955641	2.978916245	2.524169953	1.147784515
14	4	0.238137012	0.028126873	0.976230478	2.148737027	1.565860298
14	5	0.47423614	-0.450058989	4.263919017	2.640042632	1.506135186
14	6	0.608669862	-1.004523298	3.330436491	3.094942494	1.565860298
15	1		1.392968352	-0.968437594	0.11569142	0.251907839
15	2		0.913696848	-0.788180414	-0.559882128	1.028334292
15	3		0.04283309	-0.843372815	0.719728002	0.729708733
15	4		0.247575608	-0.716767228	2.070070941	0.669983621
15	5	0.416692735	0.859003497	-0.760122736	1.995316431	1.088059404
15	6		0.264054044	-0.654850444	1.102953508	-0.40506839
16	1		1.043532795	-0.243396237	0.311131293	-0.106442831
16	2		-0.156040454	0.603766407	0.720421806	0.371358063
16	3		0.855411385	0.269445519	-0.512573817	0.96860918
16	4	-0.647935102	2.01588069	0.756767813	-0.46691035	1.088059404
16	5	-0.352997958	-0.060297438	1.613621762	-0.583588371	1.147784515
16	6	1.152401878	-0.325827102	0.622202828	-0.43372371	0.371358063
17	1		1.028950658	-0.968437594	0.376277918	0.371358063
17	2		0.776687143	-0.788180414	0.545834906	0.729708733
17	3		-0.23656237	-0.843372815	0.477668716	0.371358063
17	4		0.480667044	-0.716767228	-0.270245133	0.789433845
17	5	0.471476544	0.433326442	-0.760122736	1.310294843	-0.285618166
17	6	0.318932599	-0.145296598	-0.654850444	2.184318957	0.192182727
18	1		-1.802527774	-0.88313861	-0.535774826	-1.241219954
18	2		-0.639741935	-0.678289876	-0.559882128	-1.480120401
18	3		-1.425735841	-0.79498941	-0.446557648	-0.823144172
18	4		-0.954218422	-0.685415419	-0.506243393	-1.659295737
18	5		-1.688612237	-0.760122736	-0.785065309	-1.719020848
18	6		-1.130942615	-0.632832284	-0.661379594	-1.719020848
19	1		-1.642873847	-0.968437594	-0.535774826	-0.046717719
19	2		0.832972167	-0.788180414	-0.559882128	0.311632951
19	3		0.590500983	-0.843372815	-0.512573817	1.267234739
19	4		-0.130886876	-0.716767228	-0.368577742	1.028334292
19	5	-0.491984264	-0.122784441	-0.760122736	-0.744769921	-0.046717719
19	6	-0.438335756	0.21723311	-0.654850444	-0.604465623	0.61025851
20	1		-0.887702899	-0.925788102	-0.210041703	0.550533398
20	2		-1.249246965	-0.788180414	-0.559882128	-0.464793502
20	3		-0.319608039	-0.698222598	-0.490568428	0.550533398
20	4		1.277962661	-0.716767228	-0.525909915	-0.166167943
20	5	-0.438385215	0.592813606	-0.737076673	-0.785065309	0.729708733
20	6	-0.905786295	-0.203822302	-0.610814125	-0.604465623	-0.882869284
21	1		0.967817025	-0.627241661	-0.079748454	-0.703693949
21	2		-0.00247157	-0.641659696	-0.618077761	-1.121769731
21	3		-1.653670242	-0.166005134	-0.512573817	-1.659295737
21	4		-2.31304194	-0.027027422	-0.525909915	-1.719020848
21	5	-1.438647165	-2.445537371	-0.575754231	-0.785065309	-1.659295737
21	6		-2.941033508	-0.610814125	-0.661379594	-1.599570625
22	1		0.661815377	0.73754207	-0.535774826	0.311632951
22	2		0.88568159	0.310724971	1.011399973	-0.76341906
22	3		0.819207534	0.414595736	-0.35853609	0.072732504
22	4		0.324451484	1.948136569	0.201751386	0.013007392
22	5	0.301080918	0.65683387	1.129654437	-0.502997596	0.61025851
22	6		0.387769845	0.864402586	-0.661379594	0.849158957
23	1		1.313073421	-0.456643694	-0.340334953	-0.345343278
23	2		-0.185365806	-0.055576824	-0.501686495	-0.166167943
23	3		0.521307068	0.995196606	-0.490568428	0.132457616
23	4		-0.043387718	0.505953338	-0.486576871	0.072732504
23	5	1.417679569	-0.719231751	0.115627661	-0.785065309	0.490808286
23	6		-0.390027249	0.071748831	-0.604465623	-0.942594396
24	1		0.378563949	-0.88313861	-0.535774826	-1.300945066
24	2		0.125300321	-0.751550235	-0.618077761	-0.584243725
24	3		-0.021928364	-0.359538757	-0.512573817	-1.360670178
24	4	-0.122319237	0.711346819	-0.654063609	-0.525909915	-1.241219954
24	5		0.504723183	-0.737076673	-0.785065309	-1.42039529
24	6		2.043208337	-0.632832284	-0.661379594	-1.42039529
25	1		-1.948385285	-0.32869522	-0.535774826	-0.40506839
25	2		-1.687072437	-0.421878619	-0.268903961	-0.942594396
25	3		-2.370861987	-0.601455786	-0.490568428	-0.464793502
25	4	-1.840842392	-1.644602687	0.317842481	-0.427577307	-0.345343278
25	5	-1.471127825	-1.709186469	-0.41443179	1.068522518	-0.166167943
25	6	-0.83034872	-0.45508414	-0.654850444	2.241232928	-0.584243725
26	1		-0.894015161	-0.456643694	-0.535774826	-0.882869284
26	2		1.531473617	-0.531769158	-0.559882128	-1.241219954
26	3		0.094215075	-0.456305569	-0.512573817	-0.882869284
26	4	0.433925768	-1.015881989	2.355710091	-0.525909915	-0.524518613
26	5	0.555528414	-0.439620028	0.945285932	-0.785065309	-1.181494843
26	6		-1.181380435	0.556148348	-0.604465623	-0.345343278
27	1	-0.865200936	-0.335324177	0.353696646	-0.340334953	1.446410074
27	2	0.644945993	-1.888049072	1.043328561	0.662226173	1.685310521
27	3	0.563109017	-1.456642768	0.221062113	2.282110667	1.207509627
27	4	-0.392407068	-1.125432631	0.631360575	2.404401809	1.625585409
27	5	-0.631548812	-1.065052703	1.936266645	1.108817905	1.207509627
27	6	-0.38098342	-0.346048993	3.57263625	1.842835131	1.446410074
28	1	0.26505249	0.28014065	0.012500713	3.177582776	1.147784515
28	2	-0.181648681	-2.811407988	3.534180769	1.82613884	1.267234739
28	3	-0.325287976	-1.514536089	1.140346824	4.966768203	1.565860298
28	4	1.123361977	-0.296981745	0.317842481	4.784050926	1.506135186
28	5	-0.638552007	-0.347151815	1.867128456	2.116202594	1.267234739
28	6	-0.601163132	-0.619777844	1.701092661	1.729007189	1.386684962
29	1		-0.311905214	0.694892579	2.460969905	-0.464793502
29	2		-0.084550452	-0.018946645	3.688399108	1.207509627
29	3		-0.441899955	-0.456305569	1.225851964	0.431083174
29	4	0.687636629	0.225398723	0.161083434	1.873405725	0.550533398
29	5	-0.251149024	0.089304557	1.636667825	2.962405732	1.565860298
29	6		-0.898700389	2.031365059	2.639630725	1.028334292
30	1		0.52708279	-0.968437594	-0.405481577	1.625585409
30	2		-0.311462825	-0.788180414	-0.559882128	1.326959851
30	3		0.627182624	-0.843372815	-0.512573817	1.446410074
30	4	0.009316225	-0.729892639	-0.716767228	2.070070941	1.147784515
30	5	-1.603931589	0.042408062	-0.760122736	-0.341816046	0.311632951
30	6		-0.514067576	-0.654850444	-0.661379594	0.013007392
31	1		0.027751007	-0.541942678	-0.470628202	-1.719020848
31	2		-0.423449371	-0.092207004	2.524486441	-1.181494843
31	3	-1.512148594	-0.25200049	-0.55307238	-0.050460635	-1.719020848
31	4	-0.340210126	-0.57051967	-0.6227118	-0.407910785	-1.599570625
31	5	-0.736258268	-1.715316015	-0.667938484	-0.744769921	-1.599570625
31	6	-1.113577409	-2.064180802	-0.500723325	0.078502029	-1.659295737
32	1		1.309017307	0.396346137	-0.535774826	-0.823144172
32	2		0.659178835	-0.092207004	-0.559882128	-1.002319507
32	3		0.725516769	0.36621233	-0.402546869	-1.480120401
32	4		0.445734419	-0.277841897	-0.34891122	-0.464793502
32	5	0.059138829	0.431645739	0.046489472	0.141728604	-1.300945066
32	6	0.126249124	0.103004888	0.26991227	0.533813797	-1.300945066
33	1		-0.551521751	1.675830885	4.93654164	-1.360670178
33	2		-0.315296375	2.764946999	3.513812208	-1.300945066
33	3		-0.724212306	1.962864723	2.172083719	-1.121769731
33	4		-0.604671702	-0.089731041	1.617740943	-1.121769731
33	5	-0.86618661	0.909115535	0.415226481	1.753544106	-1.121769731
33	6	-0.37909398	-0.527301808	1.216693144	0.989125566	-1.181494843
34	1		-1.058969334	-0.669891152	-0.535774826	-1.42039529
34	2		-1.596844884	0.640396587	-0.559882128	-1.062044619
34	3		0.873700989	-0.21438854	-0.490568428	-1.181494843
34	4		-1.729916961	-0.403249134	-0.525909915	-0.882869284
34	5		-1.164240277	-0.64489242	-0.785065309	-0.40506839
34	6		-2.229917809	-0.588795965	-0.604465623	-1.360670178
35	1		0.868545098	-0.712540644	-0.535774826	-0.524518613
35	2		0.507928879	-0.568399337	-0.618077761	-0.643968837
35	3		1.023990278	-0.746606004	-0.248509142	-0.76341906
35	4		0.396082831	-0.591359991	-0.46691035	-0.046717719
35	5	-0.734914421	0.525567469	-0.529662105	-0.059748333	-0.703693949
35	6	-0.392175997	1.270078773	-0.236505407	-0.376809739	-0.106442831
36	1		0.727849433	-0.968437594	-0.01460183	0.072732504
36	2		-0.933784981	-0.788180414	-0.443490861	-0.703693949
36	3		0.654990108	-0.843372815	2.10606755	-0.106442831
36	4		0.466886317	-0.716767228	0.49674921	0.96860918
36	5	1.119798531	0.893278322	-0.760122736	2.277384144	0.789433845
36	6	-0.934412587	-0.385746314	-0.654850444	0.989125566	0.789433845
37	1		1.302573276	-0.968437594	-0.470628202	1.207509627
37	2		0.541367797	-0.788180414	-0.559882128	0.849158957
37	3		-0.711214335	-0.843372815	-0.402546869	0.251907839
37	4	0.129008832	-0.484405068	-0.716767228	-0.073579917	0.251907839
37	5	-0.759792584	-0.654350917	-0.760122736	-0.180634496	0.251907839
37	6		-0.746150541	-0.654850444	-0.319895768	0.550533398
38	1		-0.511898129	0.524294612	-0.275188328	-1.002319507
38	2		-0.606661605	0.200834433	-0.501686495	-0.106442831
38	3		0.171785821	-0.746606004	-0.512573817	-0.942594396
38	4		-0.441939142	-0.12108285	-0.486576871	-0.285618166
38	5	-0.607008922	-0.153316523	0.184765851	-0.704474534	-0.225893055
38	6		0.285637424	-0.104396448	-0.319895768	-0.285618166
39	1		-0.635886817	1.121387494	-0.405481577	0.669983621
39	2		-0.302587116	1.336369998	-0.501686495	0.908884068
39	3		0.338456869	2.785382622	-0.490568428	1.326959851
39	4		0.379990697	1.258396763	-0.486576871	1.685310521
39	5		1.705090239	0.968331996	-0.744769921	1.386684962
39	6		0.606350687	0.974493386	-0.604465623	1.147784515
40	1		-0.594028623	-0.243396237	0.180838044	0.431083174
40	2		0.189934413	-0.311988081	-0.385295228	1.088059404
40	3		0.777559973	1.091963418	-0.116476804	0.789433845
40	4	-0.814649915	2.185018895	-0.716767228	0.398416602	0.490808286
40	5	1.109511777	1.294717258	-0.760122736	1.149113293	0.371358063
40	6	-0.688217693	0.398323135	-0.654850444	-0.376809739	0.669983621
41	1		0.751761021	-0.968437594	-0.535774826	0.96860918
41	2		1.276356996	-0.788180414	0.080269839	0.550533398
41	3		2.322955008	-0.843372815	-0.402546869	1.386684962
41	4		0.351362631	-0.716767228	-0.368577742	0.849158957
41	5	-0.797870221	1.571322179	-0.760122736	0.38350093	1.685310521
41	6	0.766565607	0.621799678	-0.654850444	-0.035325913	1.326959851
42	1		0.718215642	-0.968437594	-0.535774826	-0.225893055
42	2		0.802205327	-0.788180414	-0.618077761	-1.360670178
42	3		0.677678818	-0.843372815	-0.446557648	-1.300945066
42	4		0.214019491	-0.716767228	-0.486576871	-1.300945066
42	5	-0.280684909	0.955816472	-0.760122736	-0.744769921	0.072732504
42	6	-0.402428335	2.125728422	-0.654850444	-0.661379594	-1.241219954
43	1	1.183922435	0.63579493	-0.413994203	-0.01460183	-0.285618166
43	2	1.112704161	0.877094151	-0.458508799	-0.501686495	0.072732504
43	3	0.867156639	-0.073248301	0.608129359	0.389647158	0.192182727
43	4	0.990366868	-0.611952175	-0.309193706	-0.034246874	-1.002319507
43	5	1.654851491	0.868156261	0.668733175	1.431181006	0.431083174
43	6	0.616722637	-0.912398292	-0.258523567	0.761469681	0.490808286
44	1		0.654095224	-0.200746745	-0.470628202	-0.584243725
44	2		1.416684454	-0.568399337	-0.618077761	0.669983621
44	3		0.143656001	-0.069238322	-0.512573817	-0.703693949
44	4		1.157000003	-0.215138278	-0.525909915	-0.942594396
44	5		0.663529676	0.184765851	-0.785065309	-1.062044619
44	6	0.193407655	0.064457962	-0.038341968	-0.604465623	-0.823144172
45	1		-1.136446833	0.268397663	0.571717792	0.013007392
45	2		-2.076389007	-0.714920055	0.196661106	-0.882869284
45	3		0.275915519	-0.746606004	0.059566313	-1.42039529
45	4		1.081711533	-0.685415419	-0.23091209	-1.42039529
45	5		0.498967995	-0.575754231	0.262614767	-0.942594396
45	6		-0.155954996	-0.588795965	-0.43372371	-1.002319507
46	1		0.715103404	-0.07279827	-0.535774826	-1.480120401
46	2		0.50696435	-0.568399337	0.080269839	-1.539845513
46	3		0.731829283	-0.359538757	-0.3365307	-0.584243725
46	4		-0.249258182	-0.560008181	-0.191579047	0.729708733
46	5	0.541273639	-1.045978582	-0.299201474	0.020842442	-1.360670178
46	6	-0.555203582	-1.423735382	0.093766991	0.306157913	-1.062044619
47	1		-0.419116873	0.481645121	-0.535774826	1.506135186
47	2		0.365663513	0.567136228	-0.618077761	1.506135186
47	3		-0.523698678	1.817714505	-0.380541479	1.028334292
47	4		0.078321202	0.192435244	-0.525909915	-0.40506839
47	5	-0.81555245	-0.110957517	0.438272545	-0.744769921	0.550533398
47	6	1.545766841	0.168944121	0.380003069	-0.661379594	1.088059404
48	1		-2.004963371	0.694892579	-0.535774826	0.729708733
48	2		-0.169447231	-0.495138978	-0.618077761	-0.524518613
48	3		-0.568349959	2.156398346	-0.512573817	-1.241219954
48	4		-0.92499525	1.697322094	-0.506243393	-1.539845513
48	5	2.298220419	-2.122189197	-0.575754231	-0.785065309	-0.464793502
48	6	2.611962331	-0.742627227	-0.566777805	-0.661379594	-0.76341906
49	1		-0.743604417	-0.840489119	-0.535774826	-1.599570625
49	2		-2.177245883	-0.678289876	-0.618077761	-1.659295737
49	3		-0.368115119	-0.649839192	-0.512573817	-0.345343278
49	4	0.226509123	-0.981554682	-0.560008181	-0.46691035	-1.181494843
49	5	2.03160045	-1.481104501	-0.41443179	0.54468248	-0.584243725
49	6	2.001535885	-0.665323256	-0.324578046	-0.547551652	-0.703693949
50	1		1.423740791	0.183098679	-0.340334953	1.088059404
50	2		1.5683418	-0.678289876	-0.618077761	0.132457616
50	3		1.299294607	-0.601455786	-0.468563038	0.61025851
50	4	0.706331921	3.197179181	-0.560008181	-0.368577742	1.446410074
50	5	1.448943243	2.482415516	-0.299201474	-0.785065309	0.669983621
50	6	0.766565607	1.672965617	-0.434668846	-0.661379594	0.132457616
51	1		0.667168233	-0.243396237	1.548917161	-0.76341906
51	2		0.427110087	-0.678289876	-0.443490861	-0.823144172
51	3		0.577670815	-0.79498941	-0.402546869	-0.166167943
51	4	2.634276472	2.120070554	-0.497304563	-0.289911655	0.311632951
51	5	2.584318661	1.686236711	-0.621846357	-0.462702209	-0.76341906
51	6	2.898218569	1.718720507	-0.456687005	-0.547551652	0.072732504
52	1		1.464858078	-0.968437594	-0.535774826	-0.166167943
52	2		0.609106228	-0.788180414	-0.618077761	0.251907839
52	3		2.131646932	-0.843372815	-0.512573817	1.088059404
52	4	1.713955789	0.721139417	-0.716767228	-0.486576871	1.386684962
52	5	-0.602210537	0.358246648	-0.760122736	-0.704474534	0.908884068
52	6		0.780429061	-0.654850444	-0.319895768	0.96860918
53	1		-1.917551037	-0.286045728	-0.340334953	-1.659295737
53	2		0.560885847	-0.678289876	-0.559882128	-1.719020848
53	3		0.187277017	-0.79498941	-0.446557648	-1.599570625
53	4		0.292102568	-0.465952753	-0.506243393	0.431083174
53	5		0.599002166	-0.71403061	-0.785065309	-1.480120401
53	6		0.485970785	-0.566777805	-0.661379594	-1.480120401
54	1		-0.361163038	0.780191562	-0.535774826	0.192182727
54	2		1.95828183	-0.495138978	-0.559882128	-0.046717719
54	3		0.700000248	-0.698222598	-0.512573817	0.311632951
54	4		-0.446353418	-0.309193706	-0.525909915	1.207509627
54	5	0.090438475	-0.845041743	-0.230063285	-0.785065309	0.849158957
54	6		0.203477294	-0.258523567	-0.604465623	0.729708733
55	1		-1.270757149	-0.115447762	-0.405481577	-1.062044619
55	2		1.03937684	-0.458508799	-0.327099594	-1.42039529
55	3		0.800748565	0.656512765	-0.468563038	-1.062044619
55	4	0.866497795	0.902269358	0.756767813	-0.525909915	-1.360670178
55	5	1.449167399	0.398369543	0.299996166	-0.422406821	-0.345343278
55	6	-0.988551544	1.245594248	1.657056342	-0.661379594	-0.166167943
56	1		0.241311292	-0.32869522	1.223184038	1.028334292
56	2		1.01888207	-0.751550235	-0.036121428	0.431083174
56	3		1.358473816	-0.79498941	-0.380541479	-0.40506839
56	4		1.236828393	-0.716767228	-0.525909915	-0.823144172
56	5	-0.084010191	0.464097719	-0.760122736	-0.301520658	-0.106442831
56	6	-0.506126194	0.397772544	-0.654850444	-0.604465623	0.251907839
57	1		-1.102967086	0.012500713	-0.535774826	0.61025851
57	2		0.642706768	-0.605029517	-0.618077761	0.192182727
57	3		0.853038988	-0.504688975	-0.512573817	-0.285618166
57	4		-0.119516922	-0.654063609	-0.525909915	0.371358063
57	5	1.185408955	-0.921866619	-0.529662105	-0.785065309	0.132457616
57	6	-0.698516507	0.125519913	-0.456687005	-0.661379594	1.207509627
58	1	1.614023995	0.894305229	-0.499293186	-0.470628202	1.685310521
58	2	1.033069125	-0.836503993	0.750287125	0.022074206	1.565860298
58	3	2.248454218	-0.646756823	-0.649839192	-0.226503752	1.625585409
58	4	0.50028743	-0.242338652	-0.215138278	-0.211245569	0.61025851
58	5	-0.633422127	0.787073957	-0.506616042	0.70586403	1.625585409
58	6		0.705112639	0.049730671	0.192329971	1.685310521
59	1	-0.258823223	1.838291108	2.59869939	1.132850867	0.301678766
59	2	-0.766941088	0.304820757	1.311036483	0.238923968	-0.391132531
59	3	-0.439264373	1.132221076	1.25771919	1.250156897	0.417147315
59	4	0.498651183	1.162089694	1.654244142	1.762877488	-0.333398256
59	5	0.754719838	0.650722928	0.615321113	1.820382922	0.186210216
59	6		0.566801724	1.555331304	1.966349178	0.994490062
60	1	-0.502835534	0.975014636	-0.84146823	-0.634817359	-1.141678101
60	2	-0.138865045	0.074329738	-0.770955416	-0.695995907	0.301678766
60	3	0.640906107	0.389682283	-0.687207393	-0.692063797	0.070741667
60	4	0.711869289	2.895944292	-0.628346472	-0.760252067	0.532615864
60	5	0.208618245	2.672579584	-0.650482319	-0.539204332	0.301678766
60	6	1.98262438	1.293423159	-0.688891034	0.842721076	1.456364259
61	1	0.608124426	-0.438801698	1.556958491	-0.550642682	-0.564335355
61	2	0.411320751	-0.745124394	3.083821665	-0.131148483	-0.622069629
61	3	-2.119536565	-0.774077966	3.640254254	0.598024401	-1.314880926
61	4	0.427705004	0.362260563	0.132517066	1.1970848	-0.853006728
61	5	1.0004421	0.165468766	0.404353874	1.042946659	-1.026209552
61	6	-0.032342317	-0.8004053	0.546851646	1.752324777	-0.622069629
62	1	-0.714963893	0.237935912	-0.429617177	-0.508555343	0.243944491
62	2	0.013375617	0.27724032	0.445257674	-0.267490964	0.936755787
62	3	-1.028684589	0.106784003	0.625618051	-0.181699235	0.763552963
62	4	0.580623486	0.21419995	0.874359016	0.05020773	0.936755787
62	5	-0.769613497	-0.082758264	1.52951248	-0.689235892	-0.50660108
62	6	-1.302164842	-0.027589644	2.435975513	1.217263777	0.013007392
63	1	-0.429968077	-0.556285118	-0.381164112	-0.59273002	0.879021513
63	2	0.464167469	-0.102074008	0.568940361	0.141536481	1.629567083
63	3	-1.326242306	-0.082929252	0.260944317	-0.082461682	0.879021513
63	4	-1.123199554	0.538748218	0.379797716	0.294874838	1.571832809
63	5	0.059952056	-0.0914854	0.879030161	0.129118069	0.705818688
63	6	-0.380099312	-1.088518891	0.901950117	0.361166175	1.225427161
64	1	-0.720108638	0.072585837	-0.696109035	-0.59273002	-0.391132531
64	2	0.475647813	0.903030046	-0.709114073	-0.15062598	0.47488159
64	3	0.064907559	-0.653601764	-0.468403152	1.902289392	0.532615864
64	4	1.304369924	-0.677147425	-0.514216941	3.169713362	0.821287238
64	5	2.419841721	-1.043797671	0.738385335	2.666015349	1.687301358
64	6	0.743826103	-1.068708393	3.558086682	0.441425326	1.629567083
65	1	-1.17771808	-1.796689851	0.612123722	-0.466468004	-0.50660108
65	2	0.318729234	-2.06937626	0.218506081	-0.67651841	-1.719020848
65	3	-0.54617261	-1.39596313	0.504060139	-0.351820756	-0.795272453
65	4	-0.83056063	-0.56265891	0.113495478	-0.546168347	-1.661286574
65	5	-0.075748911	-1.605377817	-0.070322413	-0.593761263	-1.661286574
65	6	0.391182605	-0.299481226	-0.376404379	-0.387919226	-1.141678101
66	1	-0.88708365	-1.034689505	-0.429617177	-0.59273002	0.070741667
66	2		0.533785954	-0.441134917	-0.734950902	0.35941304
66	3		-0.507834424	-0.346845241	-0.762947764	0.648084414
66	4	-0.665829736	-0.234384298	-0.590303295	-0.80612715	0.763552963
66	5	0.064529205	-0.23891068	-0.597740509	-0.743792822	0.47488159
66	6	-1.311051566	0.947629844	-0.688891034	-0.735708876	-0.448866805
67	1	-1.056550274	-0.519799235	0.176046136	-0.213943972	0.35941304
67	2	-0.254922472	-0.732087563	0.630781704	-0.67651841	-0.448866805
67	3	-1.266999971	0.31997711	1.184784443	-0.521942276	-0.564335355
67	4	-1.004126239	0.615499928	-0.324001057	-0.59204343	-0.50660108
67	5	-0.377639947	-0.669494091	-0.509837493	-0.402812005	-0.910741003
67	6		0.218235855	-0.61787134	-0.601943626	0.590350139
68	1	-0.880953134	-0.803294615	-0.84146823	0.122754738	-0.737538179
68	2	-0.232896194	-0.690944457	-0.770955416	0.29735646	0.821287238
68	3	-0.385889288	-1.799714064	-0.687207393	0.47043326	-0.160195432
68	4	1.005234986	-2.635588537	-0.628346472	-0.393251404	-0.275663981
68	5	0.411520964	-1.958642938	-0.650482319	-0.525565099	-0.448866805
68	6		-1.9358103	-0.688891034	-0.468178376	0.821287238
69	1	0.533328469	2.566039148	0.054913474	-0.59273002	1.687301358
69	2		2.852496503	0.321574986	-0.715473405	1.687301358
69	3		1.437412614	4.077862735	-0.833831731	1.629567083
69	4	2.259925829	0.500347849	3.860748402	-0.852002233	1.34089571
69	5	1.165626039	0.693431255	5.678534838	-0.784710521	1.571832809
69	6	0.318161901	0.477146882	4.168856052	-0.762461926	-1.199412376
70	1	-1.123359384	1.433747253	0.054913474	5.173235385	1.514098534
70	2	-1.254810071	0.001232943	0.89876086	1.154366346	1.571832809
70	3	0.412697643	-0.389901271	0.066451658	-0.011577715	1.514098534
70	4	0.120717485	0.271479038	-0.419108999	0.692458889	1.687301358
70	5	-0.397928933	-0.149032931	0.474676287	1.397566709	1.629567083
70	6	-0.877413317	-0.504945707	0.205957113	-0.066882625	1.687301358
71	1		0.737830927	3.446628029	0.543628125	-0.795272453
71	2		-0.4433703	3.681621319	1.115411351	-1.3726152
71	3		-0.143722282	1.111849697	3.475913458	-0.679803904
71	4		-0.009277001	3.746618872	0.340749921	-1.199412376
71	5	2.022797993	-0.385198606	2.338220228	1.24753515	-0.333398256
71	6		-0.54222627	1.399087977	0.441425326	-0.275663981
72	1	2.125158919	-0.56118448	-0.84146823	-0.424380665	-1.603552299
72	2	1.553299189	-0.7716554	-0.420521136	-0.442788441	-1.257146651
72	3	0.604579005	0.118116875	-0.419779987	-0.677887004	-1.661286574
72	4	-1.666228711	-1.894213605	-0.590303295	-0.683793596	-1.603552299
72	5	-1.208056829	-1.147945725	-0.650482319	-0.716514357	-1.719020848
72	6	0.458101405	-0.36336788	-0.532647707	-0.762461926	-1.719020848
73	1	0.420818736	-0.49115658	-0.84146823	-0.634817359	-0.910741003
73	2	-0.206963196	-0.632127947	-0.770955416	-0.734950902	-0.679803904
73	3	0.758208017	-2.015240712	-0.687207393	-0.45105831	-1.257146651
73	4	0.449447639	-0.827963735	-0.628346472	-0.16387599	-0.217929706
73	5	1.141809159	-0.307040449	-0.650482319	0.579212748	-0.679803904
73	6	1.364540796	-1.296677769	-0.688891034	0.173894825	-1.083943827
74	1	2.83887582	0.575762474	-0.768788633	-0.003507278	-1.661286574
74	2	-0.132503165	-0.405840043	-0.564817604	-0.637563415	-1.661286574
74	3	0.735988098	-0.292308998	-0.687207393	-0.777124557	-1.719020848
74	4		1.503145672	-0.495195353	-0.423834793	-1.430349475
74	5		2.790174017	-0.597740509	-0.743792822	-1.545818024
74	6		0.545078641	-0.660483156	-0.708955826	-1.257146651
75	1	-0.103473788	-0.971916521	-0.260031449	0.964501512	1.398629985
75	2	0.004490916	-1.228145772	-0.358679793	0.589518921	1.34089571
75	3	0.408761826	-1.115740861	-0.541337899	0.824853095	0.47488159
75	4	0.134805845	-1.291415323	-0.495195353	1.135918023	1.514098534
75	5	0.510861898	-1.311372067	-0.597740509	1.45212364	0.821287238
75	6	0.679467813	-1.686987387	-0.007101969	0.949733276	0.648084414
76	1		0.834921404	-0.84146823	0.03858006	0.590350139
76	2	0.400809488	0.172538514	-0.770955416	-0.306445959	-0.333398256
76	3	0.751867352	0.772882851	-0.687207393	-0.351820756	-0.622069629
76	4	-0.296113072	-0.672023688	-0.628346472	-0.347376322	-0.622069629
76	5	0.160955942	0.203931433	-0.650482319	0.851997402	-0.391132531
76	6	0.811110765	-1.628533333	-0.688891034	-0.013376525	-0.50660108
77	1	0.420818736	-0.58642079	-0.381164112	-0.59273002	-0.217929706
77	2	1.08990731	-0.245613317	-0.234997105	-0.734950902	0.070741667
77	3	1.16552322	-0.785997385	-0.128041	-0.692063797	-0.737538179
77	4	-0.818970755	-1.589201234	0.550992012	0.493666864	-0.391132531
77	5	-0.329761917	-0.719939589	0.017580603	3.607122404	1.052224337
77	6		-1.164543449	-0.333792563	3.196989479	0.936755787
78	1	0.641777287	-0.222567432	-0.623429437	-0.424380665	-1.257146651
78	2		0.297890068	-0.1319282	-0.559653425	-1.430349475
78	3	-0.268680167	-0.165332683	-0.589961063	-0.323467169	-1.545818024
78	4	0.355347206	-0.590080851	-0.609324883	-0.576751736	-1.314880926
78	5	1.738961283	0.572555091	-0.632901716	-0.416451238	-1.199412376
78	6		-0.321816929	-0.674687095	-0.414672276	-0.044726882
79	1	-0.81002821	0.989138947	-0.84146823	1.04867619	1.109958611
79	2	1.535642875	1.846944088	-0.770955416	-0.033760995	0.994490062
79	3	0.367305689	0.663831441	-0.687207393	1.562046351	0.936755787
79	4	1.526736417	0.800650854	-0.628346472	1.472335297	0.186210216
79	5	0.668567438	0.184229202	-0.650482319	0.429181189	1.398629985
79	6	0.414195811	-0.106659729	-0.688891034	1.912843078	1.514098534
80	1	1.821745437	0.036352828	-0.84146823	2.605907723	-0.333398256
80	2	2.316538157	-1.036937123	-0.770955416	-0.657040912	-0.795272453
80	3	0.682885532	-0.881855686	-0.687207393	-0.819654938	-0.853006728
80	4	-0.415822963	0.262704613	-0.628346472	-0.852002233	-1.3726152
80	5	2.007405162	-0.796006337	-0.650482319	-0.771071288	-0.737538179
80	6	1.272345499	-0.712286278	-0.688891034	2.447904078	-0.910741003
81	1	0.066493358	-0.129168511	-0.211578384	-0.340205988	-1.48808375
81	2	-1.538386873	-0.340248777	-0.564817604	-0.637563415	-0.910741003
81	3		-1.014981357	0.285255899	-0.649533417	-1.199412376
81	4	-0.737242081	-0.559144452	-0.000634053	-0.821418844	-1.48808375
81	5		-0.044805795	0.369192668	-0.689235892	-1.141678101
81	6		0.096776773	-0.319588624	-0.682202776	-1.661286574
82	1	0.509462523	1.22223788	-0.114672254	-0.634817359	1.283161435
82	2	0.033031519	1.504939536	0.465871455	-0.715473405	1.052224337
82	3	1.476594621	0.723568127	0.18800957	-0.507765483	0.994490062
82	4	2.215362283	0.642510919	0.760229485	-0.775543761	0.013007392
82	5	1.495144173	0.10207683	0.615321113	-0.771071288	0.879021513
82	6	0.134870047	0.642853018	0.220161052	-0.735708876	-0.160195432
83	1	-0.25408251	-0.794520989	-0.211578384	1.3853749	-1.083943827
83	2	-0.123760019	-1.157982744	0.692623048	1.602348786	0.532615864
83	3	-0.370671266	-0.8993114	-0.419779987	0.555494021	1.283161435
83	4	-1.314726523	-1.474141459	-0.076720407	0.539541946	1.167692886
83	5	-0.063712668	-1.311654816	0.070322413	1.383927477	1.456364259
83	6	-0.774517208	-1.260046133	0.24856893	-0.147141775	1.34089571
84	1	0.734422744	0.39894232	-0.017766124	-0.256031311	-0.160195432
84	2	-0.628848525	-0.574377897	0.177278518	-0.579130923	-0.564335355
84	3	-0.727787008	0.336748764	-0.687207393	-0.734594177	-0.044726882
84	4	-0.392260828	-0.96934875	-0.381065822	-0.836710538	-0.448866805
84	5	-1.092059011	-0.928521054	-0.105483619	-0.157305817	-0.622069629
84	6	-1.16643688	0.040763608	-0.007101969	-0.708955826	-0.853006728
85	1		-1.279563443	-0.356937579	-0.003507278	-1.026209552
85	2		-0.661169203	-0.090700637	-0.559653425	0.763552963
85	3		-1.198160619	-0.541337899	-0.139168855	0.013007392
85	4		-0.953973848	-0.514216941	0.325458227	1.398629985
85	5		-0.426636615	-0.175806032	0.306428094	1.225427161
85	6		-0.765608643	0.163345297	0.762461926	0.301678766
86	1	0.067931923	0.20594552	0.563670657	-0.634817359	1.225427161
86	2	0.97185757	0.344417095	1.331650265	1.251753833	1.283161435
86	3	0.220953924	-0.90613811	0.382502228	0.796499508	1.109958611
86	4	-0.165329264	-0.601729504	0.512948835	0.126666201	0.590350139
86	5	0.770528305	-0.191811182	0.193386635	0.770162006	1.514098534
86	6	0.632118654	-0.077353505	-0.688891034	0.361166175	1.398629985
87	1	-0.375668805	2.300368218	-0.696109035	0.37527877	1.34089571
87	2	-1.939880227	1.058319354	-0.66788651	2.303538693	1.109958611
87	3	0.682885532	0.923366247	-0.225287329	1.562046351	1.398629985
87	4	-0.781141867	0.824840737	-0.514216941	1.380585132	1.456364259
87	5	-0.731645316	0.230982982	-0.650482319	0.088200371	1.283161435
87	6	-0.817824768	0.326056835	-0.688891034	1.725571727	0.879021513
88	1	-1.774475605	-0.255288084	0.200272669	-0.003507278	0.705818688
88	2	0.966255443	-0.390270183	0.465871455	0.414221445	0.879021513
88	3	0.379996469	-1.004049819	-0.030794671	1.080035376	0.821287238
88	4	-0.255069096	0.041949991	-0.000634053	1.105334635	0.070741667
88	5	0.044910668	-0.341490647	0.5449987	0.674687377	0.648084414
88	6	-0.233461931	0.51094699	0.830930423	0.093635675	0.243944491
89	1	-0.551113707	0.601863924	-0.502296775	-0.634817359	-0.275663981
89	2	-1.452552625	1.065323537	-0.585431386	-0.695995907	0.417147315
89	3	-0.66341905	0.422307532	-0.687207393	-0.833831731	-0.50660108
89	4	0.094358622	-0.136659694	-0.628346472	-0.836710538	-0.679803904
89	5	-1.06991057	0.557851966	-0.650482319	-0.784710521	-0.795272453
89	6		1.59608486	-0.688891034	-0.762461926	0.186210216
90	1		-0.794349291	1.823450349	-0.298118649	1.456364259
90	2		-0.866687864	1.001829766	-0.403833446	1.167692886
90	3		-1.062049833	0.431125393	-0.295113582	0.705818688
90	4	-1.088156597	-1.900065099	3.004776922	-0.118000907	0.648084414
90	5		-1.768058433	-0.035161206	-0.689235892	-0.160195432
90	6		-1.676711407	0.688891034	-0.575190576	0.417147315
91	1	2.491170104	0.049653297	3.858479082	-0.213943972	-0.448866805
91	2	2.251523286	0.399441227	3.661007538	-0.657040912	-0.160195432
91	3	1.806041352	1.155624756	1.160472861	0.442079674	-0.102461157
91	4	2.54632007	0.139478655	0.436862481	-0.530876653	-0.968475277
91	5	0.492288891	0.935921938	0.05274181	0.265510396	-0.564335355
91	6		0.702409813	0.149141358	-0.414672276	-1.314880926
92	1	1.226002878	-1.824650687	-0.84146823	-0.045594617	-1.430349475
92	2	-0.033073707	-0.628781243	-0.770955416	-0.734950902	-1.48808375
92	3	-1.90649303	0.76992538	-0.687207393	-0.833831731	-1.48808375
92	4	-1.183731216	-0.440753311	-0.628346472	-0.852002233	-0.564335355
92	5	-0.331862598	0.025215248	-0.650482319	-0.784710521	-0.968475277
92	6		0.713091055	-0.688891034	-0.735708876	-0.737538179
93	1	-0.397155016	-0.276361078	1.435825828	-0.213943972	-0.679803904
93	2	-1.329211543	-0.408376626	0.342188768	-0.481743436	-0.50660108
93	3	-0.761011473	0.054201985	0.333879063	0.952444236	0.301678766
93	4	-1.196847107	0.354794914	-0.266936291	2.191044928	0.705818688
93	5		0.140280517	0	0.142757302	0.243944491
93	6		0.561395117	-0.163345297	-0.628696676	-0.102461157
94	1	-0.931244929	-0.314606519	-0.84146823	2.900519094	-0.102461157
94	2	-1.260763889	0.082650087	-0.770955416	0.862203885	-0.853006728
94	3	-0.081626616	-1.222755453	-0.687207393	0.328665327	-0.391132531
94	4	-0.235075	0.039135264	-0.628346472	-0.148584296	0.301678766
94	5	0.133112236	0.134936048	-0.650482319	0.497377352	-0.044726882
94	6		-0.087019918	-0.688891034	0.173894825	-0.795272453
95	1	-0.493291487	0.359875476	0.200272669	-0.550642682	0.47488159
95	2	-1.045743662	0.92765653	-0.090700637	0.180491476	-0.275663981
95	3		-0.04443724	0.552683304	2.072410913	1.571832809
95	4	-1.542970145	-0.540242369	-0.000634053	1.778169183	0.47488159
95	5	-1.137917447	0.150381847	0.05274181	1.765825992	0.417147315
95	6		-0.187625897	0.234364991	3.250495579	-0.391132531
96	1	0.066493358	-0.817321024	-0.64765597	-0.59273002	-1.199412376
96	2	-1.014141279	-0.409352941	-0.709114073	-0.67651841	-1.314880926
96	3	0.412697643	0.024988187	-0.687207393	-0.805478144	-0.910741003
96	4	-0.809698997	-0.126758399	-0.552260118	-0.80612715	-0.795272453
96	5	-1.293707765	0.247656232	-0.509837493	-0.771071288	-1.257146651
96	6		1.069952515	-0.632075279	-0.708955826	-0.217929706
97	1	1.050504745	1.614598071	-0.405390644	-0.382293327	0.186210216
97	2	0.436343706	0.347845991	-0.48236248	-0.715473405	-0.217929706
97	3	-1.80106643	1.882194227	-0.152352582	-0.819654938	0.590350139
97	4	-0.415822963	1.631607287	-0.343022645	-0.836710538	0.417147315
97	5	0.57697962	0.376578458	-0.404353874	-0.771071288	0.763552963
97	6		1.406430554	-0.205957113	-0.682202776	0.763552963
98	1	0.832077685	1.635079512	0.539444125	-0.634817359	0.013007392
98	2	0.481922069	1.341737371	-0.585431386	-0.734950902	-0.102461157
98	3	0.329656503	2.971281028	0.090763241	-0.805478144	-0.333398256
98	4	1.288756292	0.653928428	-0.095741995	-0.852002233	0.35941304
98	5	-0.432631531	1.587672941	-0.369192668	-0.784710521	1.167692886
98	6	0.46776842	1.541260762	-0.532647707	-0.762461926	-0.679803904
99	1		0.380088732	-0.84146823	-0.634817359	-1.545818024
99	2	-0.713071479	1.621301869	-0.770955416	-0.715473405	-1.026209552
99	3	-1.632910267	1.078087219	-0.687207393	-0.819654938	-1.083943827
99	4	-1.361035886	0.619201677	-0.628346472	-0.546168347	-0.737538179
99	5	-1.139313571	2.288244163	-0.650482319	-0.757432055	-1.314880926
99	6	-0.861824972	1.339373272	-0.688891034	-0.628696676	-1.430349475
100	1	-0.703652741	0.641846283	-0.671882502	-0.550642682	-1.719020848
100	2	-1.371435068	0.731313852	-0.606045167	-0.715473405	-1.603552299
100	3	-0.550847264	2.348138326	-0.589961063	-0.692063797	-1.141678101
100	4	-0.499289232	1.994704276	-0.495195353	-0.622626819	-1.083943827
100	5	-1.275102302	1.165435526	-0.597740509	-0.689235892	-1.083943827
100	6		1.245022303	-0.532647707	0.387919226	0.532615864
101	1	-1.511821225	-0.130711225	-0.696109035	-0.634817359	0.417147315
101	2	0.530168312	0.06579783	-0.750341635	-0.734950902	-0.737538179
101	3	-0.583919737	0.471730291	-0.687207393	-0.819654938	-0.275663981
101	4	-0.149052222	0.785427855	-0.609324883	-0.852002233	1.283161435
101	5	-0.328822285	1.453803995	-0.632901716	-0.771071288	0.070741667
101	6	-0.032342317	1.942781592	-0.660483156	-0.762461926	0.47488159
102	1	-0.105583184	0.159239105	0.006460409	-0.634817359	1.052224337
102	2	-1.039885061	1.07530607	-0.234997105	0.589518921	-0.044726882
102	3	1.540803698	-0.007375945	1.427900266	-0.436881516	1.225427161
102	4	0.189993792	0.374066435	0.646099954	-0.80612715	-0.160195432
102	5	0.478429341	0.021029835	-0.070322413	-0.389172773	-0.275663981
102	6	1.142349539	-0.022261342	1.058193444	-0.682202776	1.052224337
103	1		0.810372002	-0.84146823	-0.634817359	-0.853006728
103	2	0.716917378	0.782641918	-0.770955416	-0.734950902	-0.968475277
103	3		1.610223389	-0.687207393	-0.833831731	-1.026209552
103	4	0.63513136	0.592600793	-0.628346472	-0.852002233	-0.910741003
103	5	-2.278132621	1.306704981	-0.650482319	-0.784710521	-1.3726152
103	6		0.664821109	-0.688891034	-0.762461926	-1.603552299
104	1	-0.883433336	-1.016355581	-0.235804917	-0.508555343	-0.622069629
104	2	-0.332639578	-0.853256498	-0.750341635	-0.734950902	-1.545818024
104	3		-0.039642676	-0.492714734	-0.819654938	-1.3726152
104	4	0.912229812	0.627045094	-0.590303295	-0.852002233	-1.257146651
104	5	-1.139313571	0.788498957	-0.597740509	-0.784710521	-1.48808375
104	6	-0.184087118	2.785632373	-0.674687095	-0.762461926	-1.48808375
105	1	1.156505014	0.709720022	-0.041992656	-0.550642682	-1.3726152
105	2		0.480406476	-0.193769543	-0.657040912	-1.141678101
105	3		-0.018867299	-0.66289581	-0.777124557	-1.603552299
105	4		0.63095707	-0.628346472	-0.852002233	-1.719020848
105	5		0.697348116	-0.597740509	-0.784710521	-1.430349475
105	6		0.742262318	-0.646279218	-0.762461926	-1.545818024
106	1	0.113394816	1.299024215	-0.381164112	0.585715464	0.763552963
106	2	0.905451827	2.230095487	-0.48236248	0.706383906	0.648084414
106	3		0.081729347	-0.66289581	0.045129459	-0.448866805
106	4	1.405846258	0.153645543	-0.609324883	-0.775543761	-1.141678101
106	5	-0.899426683	-0.21091147	-0.5449987	-0.743792822	-0.217929706
106	6		0.538624199	-0.518443768	-0.601943626	-0.968475277
107	1	0.252335334	0.290417027	0.709029852	0.206929415	0.648084414
107	2	-0.647050336	0.850094091	-0.008245512	-0.540175928	0.128475942
107	3	0.45824218	0.416860317	-0.006483089	-0.436881516	0.128475942
107	4	1.185523038	-0.435452644	0.436862481	0.401916698	0.128475942
107	5	-0.708928874	0.554968649	-0.158225429	-0.402812005	-0.102461157
107	6	2.465703159	0.652964829	1.242844649	0.254153975	0.128475942
108	1	-0.158135494	0.048316026	0.127593071	-0.256031311	-1.314880926
108	2	-0.599696599	-0.34512169	-0.111314418	-0.67651841	-1.083943827
108	3		0.343920711	-0.638584228	-0.692063797	-0.968475277
108	4	0.037290034	-0.007249789	-0.019655641	-0.852002233	-1.026209552
108	5	-1.00482162	0.100770426	-0.351612064	-0.784710521	-0.853006728
108	6	-1.597750386	0.107063625	-0.518443768	-0.762461926	-1.026209552
109	1		0.79177781	1.411599296	-0.59273002	-0.044726882
109	2		1.114449904	0.445257674	-0.734950902	0.013007392
109	3		0.959733795	-0.079417835	-0.819654938	1.052224337
109	4		2.065536195	-0.362044233	-0.852002233	0.879021513
109	5		1.223693672	-0.457095684	-0.784710521	0.35941304
109	6		0.155334468	-0.561055585	-0.762461926	0.35941304
110	1		0.568517416	-0.84146823	-0.634817359	1.629567083
110	2		0.277850813	-0.770955416	-0.131148483	1.398629985
110	3		0.358331605	-0.687207393	1.235980103	1.687301358
110	4		0.430839152	-0.628346472	0.539541946	1.629567083
110	5		-1.565909232	-0.650482319	-0.280058911	1.34089571
110	6		-0.947978856	-0.688891034	-0.280907025	1.571832809
111	1	-0.258823223	-1.254976934	-0.138898787	-0.634817359	-0.968475277
111	2	1.631873597	-1.948209509	-0.111314418	-0.715473405	-1.199412376
111	3	2.513190756	0.563994925	-0.687207393	-0.833831731	-1.430349475
111	4	1.448991778	0.716763279	-0.552260118	-0.852002233	-1.545818024
111	5	-1.344869618	0.630549918	-0.615321113	-0.784710521	-1.603552299
111	6	-0.608424811	0.61034803	-0.603667401	-0.762461926	-1.3726152
112	1	-0.913095165	-0.326865618	-0.381164112	0.164842077	0.532615864
112	2	0.548768178	-0.492489723	-0.647272729	4.426585909	0.705818688
112	3	-0.230776392	0.374401885	-0.541337899	3.135670417	1.167692886
112	4	-0.233792299	0.433048794	-0.228893114	3.246171833	-0.102461157
112	5	-0.186662151	-0.537639809	0.527418096	2.175002972	0.013007392
112	6	0.586360377	-0.371271561	0.205957113	-0.254153975	-0.564335355
113	1		-0.826853478	0.830162515	-0.171856633	0.936755787
113	2		0.05477237	1.475946733	0.199968973	0.186210216
113	3		0.274179662	2.765037292	0.668908368	-0.217929706
113	4	-0.486063819	0.370377064	2.243913384	-0.010959048	0.243944491
113	5	0.781141953	-0.092360756	0.914191367	-0.457368936	0.532615864
113	6	-1.857138972	-0.080215562	1.043989505	-0.441425326	-0.333398256
114	1		-0.800577674	0.224499202	0.627802803	1.571832809
114	2		-0.626814802	-0.255610887	0.764816398	1.456364259
114	3	0.612644811	-1.297237396	0.115074823	-0.507765483	1.456364259
114	4	-0.603860724	-0.971375449	0.360776128	0.294874838	1.225427161
114	5	-0.459763873	-0.828930423	1.107578003	0.497377352	0.994490062
114	6	-0.077819515	-1.904008772	-0.347996502	-0.655449726	1.283161435
115	1		-2.014906786	-0.84146823	-0.256031311	1.167692886
115	2		-1.745535743	-0.770955416	1.758168765	0.590350139
115	3	0.527077929	-1.864231016	-0.687207393	-0.805478144	0.243944491
115	4	0.36766864	-1.394601847	-0.628346472	-0.439126487	1.109958611
115	5	-0.560606827	-0.832424218	-0.650482319	-0.743792822	0.128475942
115	6	-0.653742999	-1.213845004	-0.688891034	-0.494931426	1.167692886
116	1		-0.908069931	0.248725734	0.122754738	0.128475942
116	2		-0.196463996	-0.049473075	0.706383906	1.225427161
116	3		-0.024451784	-0.565649481	-0.53611907	0.35941304
116	4	-1.239479054	-0.41424872	0.303711362	-0.194459379	1.052224337
116	5		-1.271601691	1.318545241	-0.37553354	0.590350139
116	6		-0.150421773	0.205957113	-0.093635675	1.109958611
117	1		-1.278118893	-0.066219189	1.090763529	0.994490062
117	2		-2.170546208	-0.66788651	1.173843843	0.243944491
117	3		-1.259822677	0.528371722	0.201074186	1.34089571
117	4	-0.546756899	-0.983706223	-0.343022645	0.493666864	-0.044726882
117	5	1.293418449	-0.755178934	1.160319812	0.415541956	0.936755787
117	6	0.378453562	-0.787331	0.24856893	-0.066882625	0.070741667
118	1		-1.359431757	0.006460409	-0.129769294	0.821287238
118	2		-0.701688108	-0.461748699	2.361971185	1.514098534
118	3	-0.862417061	-0.218712853	-0.517026317	0.626377988	0.186210216
118	4	0.355347206	-0.356123931	-0.628346472	0.738333972	0.994490062
118	5	0.235398257	-1.038757882	-0.615321113	-0.757432055	1.109958611
118	6	-1.474737606	-0.960308266	-0.163345297	-0.708955826	0.705818688
119	1		1.617262501	2.95830866	-0.536213062	-0.394528664
119	2	0.49096198	0.631036946	0.687666733	-0.461354277	-0.156799298
119	3	-0.411738265	0.280919942	0.358532613	-0.630807773	-0.937910073
119	4	-0.105478847	0.954764143	0.18535408	-0.577939661	-1.413368806
119	5	-0.730644899	1.219201751	0.300347826	-0.630125068	-0.360567326
119	6	-0.275534961	1.660850626	-0.295636029	-0.518317302	-1.413368806
120	1	-1.298365328	0.072639968	1.930645882	0.80400675	1.711074295
120	2		0.725429698	0.471327439	0.53493654	1.541267605
120	3		0.025978303	-0.084988436	0.805864475	1.201654224
120	4	-0.298869661	0.27661851	-0.425250151	0.815153701	-0.054915284
120	5	-0.587681429	0.42767156	0.678563607	0.215906435	0.760156829
120	6	-0.897356584	0.194980704	-0.187165256	-0.518317302	1.201654224
121	1	0.169086965	0.347034893	0.549724023	1.633666634	1.09977021
121	2	-0.189740511	0.322423225	-0.538255935	1.016477102	-0.258683312
121	3		-0.275123492	-0.548669534	0.651935306	-1.481291482
121	4	-0.987911372	1.0715378	-0.244330379	-0.040254504	-1.311484792
121	5	-0.881117438	0.943552996	0.513094203	0.138994481	-1.243562116
121	6	-0.073865074	0.202228144	-0.078694482	0.127293666	-0.971871411
122	1		1.125612115	-0.927541221	-0.472393071	0.692234153
122	2	0.720852266	1.204148922	-0.706519831	-0.411539736	0.726195491
122	3	1.374126922	1.383669021	-0.588989629	-0.579498049	0.624311477
122	4	-0.15695488	1.108065074	-0.606169923	-0.553499427	0.862040844
122	5	1.065998168	0.985178532	-0.692468599	-0.630125068	-0.700180707
122	6		1.791189533	-0.664436658	-0.518317302	0.250736759
123	1		-2.577974146	-0.766968912	-0.568123058	-1.68505951
123	2		-1.803118611	0.591515936	-0.461354277	-1.005832749
123	3		-0.950428834	0.338372566	-0.630807773	-0.496412679
123	4		0.365873186	-0.606169923	-0.602379895	-1.481291482
123	5		-0.631603484	-0.668830113	-0.630125068	-1.617136834
123	6		0.051721037	-0.577660039	-0.518317302	-1.549214158
124	1	0.366491419	1.523256801	0.228579405	5.622416076	0.420543449
124	2	2.269796555	0.644737778	-0.442105138	5.765463331	1.201654224
124	3	1.287386585	1.482900419	-0.488189391	1.729439491	1.43938359
124	4	2.826534503	1.105077395	-0.402635179	-0.602379895	1.303538238
124	5	-0.51372208	1.578829049	-0.526999195	-0.630125068	1.2695769
124	6	0.456693225	0.903313362	-0.404106802	-0.518317302	1.643151619
125	1		0.217979371	-0.927541221	0.325356817	0.182814083
125	2	1.267467492	-0.066075131	-0.706519831	1.116106184	1.031847534
125	3		0.64298004	-0.588989629	0.985448506	0.590350139
125	4		0.437357874	-0.606169923	-0.089134973	0.318659435
125	5		1.328011453	-0.692468599	-0.322477249	-0.258683312
125	6		0.374382596	-0.664436658	-0.518317302	-0.666219369
126	1	1.16216698	1.046751905	0.292808328	0.038166857	0.488466125
126	2	1.776133895	0.846017717	-0.490180536	-0.44474943	0.624311477
126	3	1.132313942	1.518408506	-0.387389152	-0.502533465	1.031847534
126	4	-0.601663231	0.684965772	-0.357405236	-0.553499427	1.133731548
126	5	0.435860662	1.420814738	0.040324477	-0.630125068	0.454504787
126	6		0.428630509	0.485353538	-0.518317302	0.692234153
127	1	0.096505177	0.372335495	-0.863312297	-0.568123058	-0.802064721
127	2	0.2462993	0.633314775	-0.706519831	-0.461354277	-0.632258031
127	3	0.640081366	1.789728432	-0.588989629	-0.630807773	-1.311484792
127	4		1.141091252	-0.493095065	-0.602379895	-1.073755425
127	5	0.225278524	1.598153703	-0.266975846	-0.630125068	-0.224721974
127	6		1.978368985	-0.273941874	-0.518317302	-0.054915284
128	1	-0.5999424	-0.870100221	-0.927541221	-0.568123058	-1.583175496
128	2	-1.080754693	-0.619208473	-0.706519831	-0.461354277	-1.413368806
128	3		1.051423998	-0.588989629	-0.605152911	-1.107716763
128	4	0.012248319	-1.237769461	-0.606169923	-0.602379895	-1.447330144
128	5	0.729131252	0.088283902	-0.692468599	-0.527575795	-1.413368806
128	6		0.560703639	-0.664436658	-0.518317302	-0.360567326
129	1	-0.386193932	-0.271769374	-0.38159537	-0.12138312	-1.005832749
129	2		0.051037079	-0.442105138	-0.461354277	-0.869987397
129	3		0.127379909	-0.528509486	-0.630807773	-1.277523454
129	4	-0.943445115	0.96056048	-0.606169923	-0.602379895	-1.243562116
129	5	0.593020442	1.297148937	-0.668830113	-0.630125068	-1.17563944
129	6		1.239355037	-0.664436658	-0.518317302	-0.903948735
130	1	0.14733283	0.742473578	-0.702739988	-0.536213062	-0.224721974
130	2		0.987567851	-0.297878941	-0.461354277	1.405422252
130	3		0.258572667	-0.306748961	-0.476878603	-0.971871411
130	4	-0.081422564	0.727095751	-0.402635179	-0.113575207	0.386582111
130	5	-0.51372208	2.21357276	-0.077867955	-0.45066384	0.522427463
130	6		1.651164831	0.767377548	-0.303113646	1.065808872
131	1	-0.528103809	-2.108832977	-0.092565214	-0.568123058	-1.51525282
131	2	-0.559798511	-1.020775311	-0.586331334	-0.461354277	-1.651098172
131	3	-1.163720671	-0.616026887	-0.528509486	-0.630807773	-0.598296693
131	4	-0.644906563	0.080557119	-0.493095065	-0.602379895	-1.039794087
131	5	-1.089250771	0.014839957	-0.692468599	-0.630125068	-0.971871411
131	6		0.974392878	-0.599354194	-0.518317302	-1.141678101
132	1	-1.204174621	-0.787320342	2.637164042	-0.536213062	0.556388801
132	2	-0.457094038	-1.372332408	5.254829616	-0.461354277	-0.666219369
132	3	0.108471035	-0.640660753	4.027661298	-0.605152911	0.182814083
132	4	-1.114723269	-1.294569541	4.052514212	-0.602379895	-0.530374017
132	5	0.177910976	-0.016733363	0.253070854	-0.630125068	-0.666219369
132	6		-0.487013037	1.201260641	-0.518317302	-1.311484792
133	1		-0.506717463	1.481043416	-0.568123058	-1.447330144
133	2		-0.063981819	-0.201728144	-0.411539736	-1.311484792
133	3		-0.188998488	2.636618005	0.472351275	-0.360567326
133	4	-0.670578277	-0.084187272	4.459583699	0.130827137	-0.734142045
133	5	0.729131252	0.511402605	2.546004027	-0.245565294	-1.073755425
133	6	-0.1412039	0.277029632	0.507047693	-0.159644542	-0.937910073
134	1	-0.475148254	-1.256333375	1.89853142	-0.057563129	0.760156829
134	2	-1.109891484	-0.764572513	0.230950445	0.352283224	0.318659435
134	3		-0.081765295	2.172936908	0.446696413	1.235615562
134	4		-0.997721141	1.542252372	0.399669716	0.692234153
134	5		-0.529131261	1.127694847	0.651740847	0.862040844
134	6		-0.000193294	-0.360718493	-0.303113646	-0.020953946
135	1	2.522241184	0.934692193	-0.927541221	-0.568123058	-1.141678101
135	2	0.946221522	-0.770785013	-0.706519831	-0.461354277	-1.141678101
135	3	0.844929862	0.065105973	-0.588989629	-0.579498049	-0.326605988
135	4	0.412178017	-1.428887442	-0.606169923	-0.504618958	0.216775421
135	5	1.654835751	-1.303088174	-0.692468599	-0.117378702	-0.632258031
135	6		-1.502921025	-0.664436658	0.772904634	0.284698097
136	1	2.472064093	1.506521924	1.19201326	-0.440483076	0.862040844
136	2	0.631238438	1.512318436	0.735742132	-0.195676726	0.92996352
136	3	0.108471035	1.410864315	0.015811802	0.369731828	-0.156799298
136	4	-0.488171949	-0.143931225	-0.176485464	0.472990419	-0.156799298
136	5	-0.555323558	0.826502978	0.560371176	0.90811403	0.148852744
136	6	0.667038704	1.659923464	0.159941218	-0.374848198	-0.530374017
137	1		1.775350126	0.967212027	-0.536213062	0.250736759
137	2		0.006423874	0.495365138	-0.44474943	-0.224721974
137	3		0.17650894	0.156932136	-0.399914018	0.420543449
137	4	0.31051198	-0.242687644	0.47934871	-0.480178723	0.148852744
137	5	-0.668863175	0.219050622	0.205793881	-0.296839931	0.896002182
137	6	-0.298304066	0.310579898	0.116552909	-0.303113646	1.541267605
138	1	-0.176537866	0.284033909	-0.542167679	-0.025653134	-0.836026059
138	2	-1.263896862	0.108892217	-0.610369033	-0.328515502	-0.802064721
138	3	-0.136404787	-0.227345805	-0.588989629	-0.476878603	-1.379407468
138	4	0.367089633	0.295596277	-0.402635179	-0.602379895	-1.277523454
138	5		0.636346182	-0.62155314	-0.578850432	-1.141678101
138	6	0.194558112	0.509754448	0.008082136	0.27076277	-0.156799298
139	1		-0.414438428	-0.221023061	-0.536213062	-0.428490002
139	2	0.145323163	-0.679816741	-0.105577346	-0.44474943	0.556388801
139	3		-1.02414324	0.358532613	-0.42556888	-0.666219369
139	4	-0.402263633	-0.120632627	0.049664251	-0.235776379	-0.802064721
139	5	-0.644453146	0.48106407	0.182155395	-0.476301159	-1.039794087
139	6	-0.892412923	-0.22006334	0.008082136	-0.518317302	-0.734142045
140	1	1.16216698	-0.112136492	-0.927541221	-0.40857308	-0.46245134
140	2	-0.480098315	-0.839637624	-0.706519831	0.352283224	1.065808872
140	3	-0.825115992	-2.074379373	-0.588989629	0.421041552	-0.428490002
140	4	-1.378546464	-0.595149101	-0.606169923	0.20414784	-0.394528664
140	5	-1.815128084	0.081351282	-0.692468599	0.523554255	-0.46245134
140	6	1.852726544	-0.266295554	-0.664436658	1.490250155	-0.326605988
141	1	-0.402539044	-1.069930093	-0.73485445	-0.568123058	-0.971871411
141	2	-2.161014419	-1.188652639	-0.706519831	-0.428144583	-1.17563944
141	3	-1.489513611	-0.003652364	-0.588989629	-0.630807773	-1.243562116
141	4	-0.424272978	0.735592134	-0.583554952	-0.602379895	-1.209600778
141	5		1.674235534	-0.526999195	-0.373751885	-1.209600778
141	6		0.772098368	-0.512577575	-0.518317302	-1.073755425
142	1		-0.068673542	-0.670625526	-0.472393071	-0.768103383
142	2		-1.394357374	-0.706519831	-0.428144583	-1.209600778
142	3		-0.359640814	-0.548669534	-0.528188326	-0.903948735
142	4	0.210113274	0.738357041	-0.583554952	-0.577939661	-1.141678101
142	5		1.182846507	-0.597914654	-0.630125068	-0.768103383
142	6		1.609049884	-0.599354194	-0.518317302	-1.34544613
143	1	-1.063192695	-0.087266977	0.581838485	-0.568123058	0.04696873
143	2	-0.860357081	-0.316054924	-0.033464248	-0.461354277	0.590350139
143	3	-0.040945892	0.726449519	-0.326909009	-0.630807773	-0.12283796
143	4	0.689630105	0.95674791	-0.063410606	-0.602379895	0.658272815
143	5	1.151937362	0.10411712	0.678563607	-0.553213114	-0.190760636
143	6		0.509387927	0.35518861	-0.518317302	0.148852744
144	1	0.512357079	-0.710530724	-0.221023061	-0.536213062	-0.869987397
144	2	-0.661915987	0.273095929	-0.634406733	-0.461354277	-1.073755425
144	3	0.193527389	0.457048209	-0.548669534	-0.579498049	-0.802064721
144	4	-0.760799271	1.029855876	-0.425250151	-0.602379895	-0.937910073
144	5	-0.487314568	1.050759095	0.063962963	-0.45066384	0.318659435
144	6	0.602543754	1.925304553	-0.035306173	-0.44658275	0.318659435
145	1		-0.465971595	-0.927541221	-0.568123058	-1.17563944
145	2		-1.267787531	-0.706519831	-0.44474943	-0.598296693
145	3		0.312599095	-0.588989629	-0.630807773	-1.039794087
145	4		-0.2882849	-0.606169923	0.350789247	-0.326605988
145	5		0.121477869	-0.692468599	0.856839393	-0.836026059
145	6	-0.743370721	-0.471778749	-0.664436658	0.27076277	-0.496412679
146	1		-2.179271559	-0.927541221	-0.568123058	-1.617136834
146	2	0.145323163	1.559694938	-0.682482131	-0.461354277	-1.51525282
146	3		-0.789807151	-0.588989629	-0.630807773	-1.719020848
146	4			-0.56093998	-0.602379895	-1.651098172
146	5	1.649039001	1.108507533	-0.550637681	-0.630125068	-1.481291482
146	6		0.852102065	-0.512577575	-0.518317302	-1.617136834
147	1		-1.192431276	2.283904962	-0.472393071	1.031847534
147	2		-1.68899842	1.288609218	0.252654142	0.488466125
147	3	-1.389800435	-1.367536099	0.600453186	1.421581152	0.013007392
147	4	-1.054239456	-0.941134536	-0.176485464	0.472990419	-0.020953946
147	5	-0.954428723	-1.420906947	-0.219698873	-0.271202612	-0.29264465
147	6	-1.149028409	-0.719119422	0.463659383	-0.303113646	-0.224721974
148	1		-0.476275275	0.742410794	-0.568123058	1.507306266
148	2	0.142680907	0.042150384	0.110761948	-0.428144583	0.963924858
148	3	-1.467231616	0.1339468	1.749575906	-0.220329988	0.862040844
148	4	-0.271364013	0.218293715	0.049664251	-0.284656848	1.2695769
148	5	-0.266132618	0.731784894	-0.550637681	0.4466423	1.337499576
148	6	-1.111921874	0.027098915	-0.664436658	-0.016175438	1.371460914
149	1	-0.237218643	-0.914024318	-0.477938755	-0.472393071	0.590350139
149	2	-0.081628995	-1.866228594	-0.249803543	-0.06283795	-1.243562116
149	3	-0.164064169	-1.648285424	-0.588989629	-0.297294572	-1.583175496
149	4		-3.317904458	-0.538325009	-0.431298254	-1.719020848
149	5	-2.362216192	-1.644275293	-0.692468599	-0.60448775	-1.719020848
149	6		-1.645204449	-0.317330183	-0.518317302	-1.651098172
150	1	1.154850555	-0.02288931	-0.221023061	-0.440483076	0.828079505
150	2	0.348499234	0.035292136	-0.538255935	1.481412817	0.454504787
150	3	-0.337488761	0.780012607	0.681093377	0.959793644	0.522427463
150	4	-0.129561626	-0.473433185	0.343658881	0.081946668	1.031847534
150	5	0.565433426	0.332959997	-0.574276168	-0.245565294	0.963924858
150	6	-0.073865074	-0.151026473	-0.664436658	-0.374848198	1.575228943
151	1		0.079644556	-0.413709832	-0.312843093	1.303538238
151	2	-1.048947012	-0.921847406	-0.129615046	-0.013023409	0.828079505
151	3	-0.470846856	1.020504832	0.439172804	0.421041552	0.726195491
151	4	-0.322320967	0.294456704	0.072279223	-0.113575207	0.420543449
151	5	-0.971569146	0.208215316	-0.668830113	1.446497714	1.065808872
151	6	-1.046102918	-0.203035085	-0.664436658	1.131577394	1.133731548
152	1	-0.891082169	0.516343716	0.035892634	-0.568123058	-0.903948735
152	2	1.16197769	1.603183281	-0.418067438	-0.311910655	-0.326605988
152	3	-1.934993785	1.035601123	2.072136669	-0.374259157	0.080930068
152	4	-0.575571027	0.420341174	1.994551803	-0.309097082	0.080930068
152	5	-1.129614945	0.036522967	3.066050726	-0.476301159	1.09977021
152	6		-0.200770109	2.481215764	-0.518317302	0.862040844
153	1	-0.973828023	-2.016691413	1.224127721	-0.536213062	0.148852744
153	2	-1.735325154	-0.187488951	1.432835414	-0.428144583	0.148852744
153	3	-0.106493514	0.80564723	-0.468029343	0.985448506	-0.530374017
153	4	-1.822490628	-0.012426279	0.072279223	-0.162455676	-0.666219369
153	5		-2.187899841	1.458633656	-0.60448775	-1.107716763
153	6		-2.527937357	0.940930785	-0.44658275	-0.802064721
154	1	0.426776296	0.292462286	-0.927541221	1.442206661	1.609190281
154	2	-0.530864062	0.351200635	-0.706519831	2.892824808	1.643151619
154	3	-0.112313718	-0.539934048	-0.588989629	2.422120753	1.711074295
154	4	-0.478778598	0.358205286	-0.606169923	1.963844719	1.711074295
154	5	-2.006915208	0.399197696	-0.692468599	1.215761849	1.711074295
154	6		0.353234856	-0.664436658	1.633719259	1.609190281
155	1		0.211808669	0.100121557	-0.344753089	1.133731548
155	2	0.817703998	1.067037391	0.086724249	-0.44474943	1.711074295
155	3	1.573966848	0.384226536	-0.528509486	-0.579498049	1.677112957
155	4	-0.362563676	1.182322935	-0.538325009	-0.553499427	1.507306266
155	5	0.159878479	0.966202351	-0.692468599	-0.630125068	0.080930068
155	6		0.552075852	-0.642742503	-0.518317302	0.556388801
156	1		0.402025411	-0.188908599	-0.536213062	1.2695769
156	2		0.667347806	0.062686549	-0.378330042	1.507306266
156	3		0.525619377	-0.044668341	-0.451223742	1.541267605
156	4		1.443571525	0.818573283	1.91496425	1.43938359
156	5	0.271047631	1.070205455	0.584009662	-0.527575795	1.677112957
156	6		0.226389054	1.396508033	-0.518317302	1.677112957
157	1	-1.159007733	1.057433708	-0.253137523	-0.185203111	0.726195491
157	2	0.424727772	0.479433993	-0.081539647	-0.06283795	-0.971871411
157	3		-0.615194691	-0.548669534	-0.348604295	-1.17563944
157	4		-0.483136764	-0.515710037	-0.504618958	-1.34544613
157	5		-0.85250477	-0.645191627	-0.45066384	-1.277523454
157	6		-0.759887281	1.353119723	0.844639186	-0.869987397
158	1	-0.678498636	0.302497696	-0.927541221	-0.536213062	0.013007392
158	2	-0.233233636	-0.64287898	-0.706519831	-0.44474943	-1.039794087
158	3		-1.11931292	-0.588989629	-0.605152911	-0.46245134
158	4	-0.284822601	-0.077066942	-0.606169923	-0.382417786	-0.12283796
158	5		-1.266985902	-0.692468599	-0.630125068	-0.326605988
158	6		-0.688726835	-0.664436658	-0.518317302	0.454504787
159	1	-1.315108909	1.44498028	-0.124679675	-0.568123058	1.473344928
159	2	0.2791555	-0.151623079	-0.586331334	-0.461354277	0.013007392
159	3	1.519051196	0.832982582	-0.588989629	-0.630807773	1.065808872
159	4	1.182526904	0.139741202	-0.56093998	-0.602379895	-0.360567326
159	5	0.668030888	0.871772897	-0.645191627	-0.630125068	0.692234153
159	6		0.690099866	-0.599354194	-0.518317302	1.235615562
160	1	0.84435767	0.656810559	0.035892634	-0.568123058	0.658272815
160	2	-0.081628995	-0.192946654	-0.177690444	-0.44474943	-0.360567326
160	3		0.308408701	-0.588989629	-0.630807773	-1.073755425
160	4	-1.400867279	-0.723167958	0.230584023	-0.602379895	-1.005832749
160	5		1.078540166	-0.668830113	-0.60448775	-1.311484792
160	6		0.607675437	-0.621048348	-0.518317302	0.182814083
161	1		0.97476885	-0.927541221	-0.376663085	0.386582111
161	2	1.191052227	0.660624946	-0.706519831	-0.345120348	0.862040844
161	3	0.099739592	-0.242706341	-0.588989629	-0.040745957	0.250736759
161	4	0.75516302	0.085838168	-0.606169923	-0.015814269	1.235615562
161	5	0.00644909	0.139919942	-0.692468599	-0.476301159	0.726195491
161	6		1.053297854	-0.664436658	-0.44658275	0.488466125
162	1	0.180390651	0.557405727	-0.863312297	-0.568123058	-1.277523454
162	2		-0.800099271	-0.706519831	-0.461354277	-1.583175496
162	3		-0.267533971	-0.588989629	-0.630807773	-1.549214158
162	4		-0.113920241	-0.606169923	-0.602379895	-0.088876622
162	5	-1.129614945	-0.014879456	-0.692468599	-0.630125068	-1.447330144
162	6		0.099802526	-0.642742503	-0.518317302	-1.583175496
163	1	0.095572601	0.194576069	-0.895426759	-0.280933098	-1.073755425
163	2	0.17913693	-0.804802626	-0.682482131	-0.411539736	-1.549214158
163	3		-0.315225378	-0.588989629	-0.194675126	-1.51525282
163	4	-0.424272978	-0.805783989	-0.606169923	-0.480178723	-1.51525282
163	5	-0.639570144	-0.794233047	-0.692468599	-0.578850432	-1.379407468
163	6		0.675044691	-0.642742503	-0.374848198	-1.17563944
164	1	-0.475148254	0.58643938	-0.188908599	-0.089473125	1.643151619
164	2	0.118165467	0.415772154	-0.225765843	-0.145862185	1.235615562
164	3	-0.192357143	0.452149443	-0.387389152	0.626280444	1.303538238
164	4	-0.158147412	0.048868389	-0.176485464	0.741832998	1.541267605
164	5	-1.06157306	-0.525711777	-0.101506441	1.574684305	0.013007392
164	6		-0.603191327	2.351050836	5.220446861	1.303538238
165	1		0.849334669	-0.927541221	-0.568123058	0.794118167
165	2	0.192192705	0.885998619	-0.706519831	-0.461354277	-0.020953946
165	3	0.938225713	0.691496818	-0.588989629	-0.502533465	0.760156829
165	4	-0.391675267	1.494797664	-0.606169923	-0.602379895	1.065808872
165	5	-0.730427776	0.670287551	-0.692468599	-0.630125068	-0.054915284
165	6	0.121245891	-0.47985364	-0.664436658	-0.518317302	0.352620773
166	1	-0.331256668	-0.189474248	0.613952947	0.16580684	-0.29264465
166	2	-0.070872945	1.381860377	0.399214341	-0.394934889	0.080930068
166	3	-0.05301974	-0.957251064	1.245574713	0.138838074	-0.088876622
166	4	-0.849038949	-0.202935521	1.06733797	-0.357977551	-0.564335355
166	5		0.289842204	0.063962963	0.549191573	-0.802064721
166	6		0.203189722	0.376882765	1.203311946	-0.29264465
167	1		-1.456024663	-0.927541221	-0.536213062	-1.413368806
167	2		-0.30055073	-0.706519831	-0.461354277	-1.68505951
167	3		-0.133472378	-0.588989629	-0.630807773	-1.651098172
167	4		0.568701815	-0.606169923	-0.602379895	-1.17563944
167	5			-0.692468599	-0.630125068	-1.583175496
167	6			-0.664436658	-0.518317302	-1.379407468
168	1		-0.034547416	-0.02833629	-0.504303067	-1.107716763
168	2	-1.975455773	-0.503736591	-0.321916641	-0.461354277	-0.937910073
168	3		0.49681196	2.636618005	-0.605152911	-0.734142045
168	4		-0.337153449	-0.425250151	-0.602379895	-0.46245134
168	5		-0.295401689	-0.408806763	-0.60448775	-0.937910073
168	6		0.454407409	-0.425800957	-0.518317302	0.828079505
169	1		0.817922278	0.83875418	1.633666634	0.997886196
169	2		2.3690046	-0.105577346	-0.428144583	0.216775421
169	3		0.427988852	-0.4075492	0.087528351	0.216775421
169	4		0.196090574	-0.063410606	-0.40685802	0.997886196
169	5		0.484540114	-0.692468599	-0.476301159	0.556388801
169	6		0.819614622	-0.295636029	-0.44658275	1.031847534
170	1	1.992391253	-1.106496187	-0.927541221	0.197716835	1.575228943
170	2	-0.902522862	-0.923360912	-0.706519831	-0.345120348	1.371460914
170	3	-0.762707198	-2.744438138	-0.588989629	-0.528188326	1.167692886
170	4	-0.655338104	-0.798502955	-0.606169923	-0.357977551	0.726195491
170	5	-0.198177734	-1.301299824	-0.692468599	-0.399389204	-0.12283796
170	6	-0.549895598	-0.830892053	-0.664436658	-0.44658275	0.624311477
171	1	0.69855038	-0.732517721	-0.73485445	-0.504303067	-1.243562116
171	2		-1.823408088	-0.706519831	-0.44474943	-1.719020848
171	3		-0.409608825	-0.508349439	-0.605152911	-0.700180707
171	4		-0.096165934	-0.493095065	-0.455738489	-1.379407468
171	5	1.013784493	-0.777181675	-0.645191627	-0.630125068	-1.549214158
171	6		-0.127901456	-0.577660039	-0.44658275	-0.598296693
172	1	-1.752400887	-1.953483482	0.100121557	1.633666634	0.624311477
172	2	-0.967297037	-0.510973997	-0.009426549	-0.013023409	-0.496412679
172	3	0.048555576	-1.368449841	-0.22610877	-0.117710541	-0.564335355
172	4	-0.375616041	-0.173886144	1.587482315	-0.260216614	0.556388801
172	5	-1.557097831	-0.826520685	2.049595814	0.267181072	-0.020953946
172	6	-0.301194439	-0.943512484	4.19505398	1.346781051	0.080930068
173	1	-0.283748716	-0.086011453	0.613952947	-0.376663085	0.114891406
173	2	-0.418534631	-0.060938137	1.384760015	0.169629907	0.114891406
173	3	-0.700955731	-0.102680852	0.499652947	0.805864475	0.04696873
173	4	0.453836668	-0.319818957	0.841188255	-0.040254504	0.488466125
173	5	-0.555555265	-0.034162738	-0.503360709	0.138994481	0.488466125
173	6		-0.336711297	0.203329528	-0.44658275	0.726195491
174	1	-0.254751157	-0.425179879	-0.927541221	0.389176808	-0.496412679
174	2	-1.397096134	-0.428873081	-0.706519831	0.003581438	-0.530374017
174	3		-0.116287192	-0.588989629	1.293306845	0.488466125
174	4	3.086497591	-0.088256232	-0.606169923	2.208247063	0.04696873
174	5	0.909121364	-0.166561506	-0.692468599	0.703015483	1.643151619
174	6	-1.630294387	0.137589965	-0.664436658	2.566268435	1.43938359
175	1	1.963148801	1.293550859	0.774525256	-0.568123058	-0.156799298
175	2		-0.278793528	0.495365138	-0.461354277	-0.46245134
175	3		-0.071659842	0.963334045	-0.630807773	-1.005832749
175	4		-0.708413984	-0.334790265	-0.602379895	-1.617136834
175	5		-1.511664	-0.668830113	-0.630125068	-1.651098172
175	6		-1.63016153	-0.621048348	-0.518317302	-1.447330144
176	1	-0.880866916	-0.34262266	1.095669874	-0.057563129	1.065808872
176	2	-0.280377071	-0.530621194	1.504948512	-0.428144583	0.760156829
176	3	0.090316192	-1.824669907	-0.266428866	-0.579498049	0.318659435
176	4	-1.608182191	-0.290948212	0.501963682	-0.138015441	0.013007392
176	5	0.173965471	-0.805862366	1.553187601	0.933751348	0.624311477
176	6		-0.580133081	2.177497599	1.131577394	1.473344928
177	1	1.456931876	-0.411718646	-0.124679675	-0.568123058	-0.054915284
177	2	0.350915203	0.218491636	0.206912746	-0.461354277	-0.190760636
177	3	0.378579719	-1.413556579	-0.548669534	-0.630807773	-1.141678101
177	4	1.206168571	0.318763476	-0.606169923	-0.602379895	-0.224721974
177	5	-0.284120751	0.57303513	-0.692468599	-0.630125068	-0.734142045
177	6		1.4931728	-0.664436658	-0.518317302	0.963924858
178	1	0.354196142	0.474224021	-0.445824294	-0.568123058	-0.666219369
178	2	-0.51419177	-0.125158219	-0.249803543	-0.411539736	-0.428490002
178	3	-1.741696889	-1.357610611	-0.508349439	-0.630807773	-1.209600778
178	4	-0.646929506	0.648888754	-0.56093998	-0.602379895	0.114891406
178	5	-0.623702949	-0.706252475	-0.550637681	-0.425026522	-0.088876622
178	6		0.599222831	-0.512577575	-0.518317302	0.216775421
179	1		0.278632406	0.581838485	-0.568123058	-0.12283796
179	2	1.822142993	-0.083074456	0.687666733	-0.461354277	0.794118167
179	3	0.036335644	-0.794563217	-0.326909009	-0.630807773	-0.29264465
179	4	0.759361918	0.062062206	-0.56093998	-0.577939661	-0.632258031
179	5	0.73572431	0.429933462	-0.243337359	-0.630125068	-0.530374017
179	6		0.771471164	0.225023682	-0.518317302	0.658272815
180	1	0.426776296	-1.268324584	-0.73485445	-0.504303067	1.167692886
180	2	-0.556001382	0.190271146	-0.418067438	-0.245491267	0.420543449
180	3	-1.444374752	-1.26305881	-0.266428866	1.241997122	0.284698097
180	4	0.396373113	-0.20616296	1.723172144	1.035115811	0.624311477
180	5	-0.644453146	-1.870785498	0.134878422	3.036011448	0.352620773
180	6	-1.881482394	-1.763263075	-0.013612019	0.772904634	-0.088876622
181	1		-0.255877443	-0.670625526	-0.568123058	0.216775421
181	2	0.212289253	1.167640114	-0.34595434	-0.328515502	0.386582111
181	3	-0.28855652	1.083224551	0.237572327	0.036218628	1.09977021
181	4	-0.485417336	0.629509871	0.275813966	-0.18689591	0.963924858
181	5		-0.330202176	1.080417875	0.087719844	1.201654224
181	6	-0.192584978	-0.672471315	0.615518466	-0.303113646	-0.46245134
182	1		-1.166811584	2.219676038	4.122646286	1.43938359
182	2	2.079250832	0.034426563	3.692379156	5.184293688	1.303538238
182	3	1.328694568	0.275972639	3.30189958	4.038377032	1.371460914
182	4	0.918071295	0.20749447	1.723172144	4.481188864	1.643151619
182	5		-1.610021935	-0.526999195	1.856694807	0.590350139
182	6		-1.835181274	-0.642742503	-0.231379094	0.04696873
183	1		-0.223377837	3.857513591	1.633666634	1.201654224
183	2		0.114448257	3.091436672	2.029372766	1.09977021
183	3		-0.460742	2.092296717	2.8582534	0.692234153
183	4		-0.85189731	1.587482315	1.646121671	1.201654224
183	5		-0.085677057	1.742295492	1.420860396	0.794118167
183	6		-0.879700472	-0.013612019	0.844639186	-0.258683312
184	1		-0.401431688	0.646067409	1.601756639	0.522427463
184	2	-0.102402568	0.390658862	0.447289739	1.099501337	1.133731548
184	3	0.938225713	-1.395489729	1.991496478	0.39538669	1.133731548
184	4		-0.588088283	1.135182885	0.986235342	0.454504787
184	5		-0.317991109	3.302435589	0.062082526	0.420543449
184	6		-0.449039957	2.112415135	-0.374848198	1.167692886
185	1		-0.576633614	2.508706195	-0.025653134	1.541267605
185	2	-0.649646112	1.193678498	2.971248175	0.750799551	1.473344928
185	3	0.193527389	0.673832576	3.443019914	0.934138783	1.473344928
185	4	0.764318872	1.63534776	4.6178885	-0.162455676	1.677112957
185	5		0.237973369	4.366167474	-0.143016021	0.216775421
185	6	-0.924857008	-1.063477595	2.45952161	-0.44658275	0.386582111
186	1	-0.10808081	-1.020997751	-0.927541221	1.857036603	0.896002182
186	2	-0.760000569	-1.036418217	-0.706519831	0.285863836	0.182814083
186	3	-0.986763201	0.693376473	-0.588989629	0.831519337	1.405422252
186	4	0.297967581	0.073068025	-0.606169923	1.499480265	0.896002182
186	5	-0.097729641	0.382943094	-0.692468599	0.421004982	0.997886196
186	6	-0.499919562	0.546307666	-0.664436658	0.772904634	1.09977021
187	1	1.91999549	0.775523978	-0.606396603	2.016586581	1.235615562
187	2	1.925100824	0.25460614	-0.418067438	2.095792154	1.43938359
187	3		0.432850079	-0.488189391	3.576589524	1.643151619
187	4	1.709867047	0.609774256	-0.515710037	2.990334564	1.575228943
187	5	1.731496304	0.308062042	-0.597914654	2.292529218	1.43938359
187	6	2.069975949	1.218873962	-0.642742503	1.418515603	1.2695769
188	1	0.063508779	0.070775718	1.19201326	-0.472393071	0.92996352
188	2	-1.129797204	-1.428804798	-0.105577346	-0.461354277	0.04696873
188	3	-1.013315972	0.156236066	-0.306748961	-0.630807773	0.148852744
188	4	-0.485417336	-2.152183909	0.18535408	-0.602379895	-0.190760636
188	5	-1.02517921	-1.696063952	0.27670934	-0.630125068	0.658272815
188	6		-1.96683906	-0.187165256	-0.518317302	0.896002182
189	1	0.977108987	-0.241083257	0.228579405	-0.568123058	-1.379407468
189	2	-0.270949188	-2.019734416	-0.057501948	-0.046233103	-1.481291482
189	3		-0.969725099	-0.508349439	-0.630807773	-0.869987397
189	4		-1.489301162	-0.425250151	-0.602379895	-0.700180707
189	5		-1.703703115	0.01668599	-0.630125068	-0.428490002
189	6		-1.556199817	-0.555965884	-0.518317302	-1.039794087
190	1	0.845501846	1.302636936	0.32492279	-0.568123058	-1.34544613
190	2		-0.068632394	-0.129615046	-0.461354277	-1.447330144
190	3		1.435246811	-0.468029343	-0.630807773	-1.447330144
190	4		0.801573589	-0.493095065	-0.602379895	-1.583175496
190	5		0.55569163	-0.43244525	-0.630125068	-1.68505951
190	6		1.248668658	-0.339024338	-0.518317302	-1.719020848
191	1		1.5395057	1.159898798	-0.536213062	1.371460914
191	2		2.731895089	1.60109931	-0.411539736	1.677112957
191	3	2.622549586	2.249051165	1.326214904	-0.605152911	1.575228943
191	4	0.000873894	2.259552414	1.112567913	4.041264644	1.609190281
191	5	1.075440987	1.558168097	1.269525765	3.702581724	1.507306266
191	6	1.488276248	1.361699018	0.094858755	3.283613956	-0.836026059
192	1	-0.794570887	0.661416124	-0.799083374	-0.568123058	-1.481291482
192	2	0.328056766	-0.350943752	-0.658444432	-0.461354277	-1.277523454
192	3	-0.326831256	-0.911537948	-0.528509486	-0.630807773	-0.836026059
192	4	-0.829165495	-1.098977101	-0.606169923	-0.553499427	-0.768103383
192	5	-0.982658207	-1.139994039	-0.574276168	-0.630125068	-0.869987397
192	6	-1.496381374	-0.703187802	-0.555965884	-0.518317302	-1.51525282
193	1	-0.011209924	-0.249686967	1.416814492	-0.504303067	0.284698097
193	2		-0.995064056	0.014611151	-0.428144583	1.337499576
193	3	0.938225713	0.261035335	0.29805247	-0.502533465	0.386582111
193	4	0.13261284	-0.183085689	0.501963682	-0.431298254	0.284698097
193	5	-1.169401411	-0.272729673	1.576826088	-0.578850432	1.473344928
193	6	-0.019348962	0.318470196	2.177497599	-0.44658275	0.114891406
194	1		-0.405636884	0.100121557	0.101986848	-0.937910073
194	2		-0.57242038	-0.321916641	-0.345120348	-0.836026059
194	3		0.549364174	-0.185788675	-0.630807773	-0.054915284
194	4		-0.069879268	-0.493095065	-0.602379895	-0.836026059
194	5	-0.270503604	0.050524768	0.182155395	-0.630125068	0.114891406
194	6		0.081042147	-0.469189266	-0.518317302	0.92996352
195	1	-1.051896148	0.872346921	-0.606396603	-0.568123058	-0.734142045
195	2	2.089004734	2.164022196	-0.297878941	-0.461354277	0.658272815
195	3	0.897833639	1.373879149	-0.508349439	-0.630807773	0.896002182
195	4	0.907520021	1.338288912	-0.56093998	-0.553499427	-0.258683312
195	5	2.181827307	0.574829138	-0.645191627	-0.630125068	0.828079505
195	6		1.410979305	-0.512577575	-0.518317302	0.590350139
196	1	0.54747646	-0.529217625	-0.253137523	-0.568123058	0.454504787
196	2	-0.041020189	0.494153069	1.336684617	-0.411539736	0.284698097
196	3	1.385164059	0.7546428	-0.205948723	-0.605152911	1.2695769
196	4	1.617531431	0.933816521	0.18535408	-0.602379895	0.828079505
196	5	2.182089974	0.169004861	1.198610306	-0.630125068	0.92996352
196	6	1.947507716	0.114909517	1.635143733	-0.518317302	-0.768103383
197	1	-1.181060989	-0.743481612	-0.253137523	-0.568123058	-1.549214158
197	2		0.474018088	-0.562293635	-0.461354277	-1.107716763
197	3			-0.488189391	-0.630807773	-0.768103383
197	4			-0.606169923	-0.602379895	-0.869987397
197	5			-0.668830113	-0.630125068	-0.903948735
197	6			-0.664436658	-0.518317302	-1.481291482
198	1		3.928354726	0.613952947	-0.568123058	0.963924858
198	2		2.364976425	1.673212408	-0.411539736	1.609190281
198	3		2.419115118	1.850376144	-0.630807773	1.609190281
198	4	2.788773673	2.459521352	0.976878084	-0.577939661	1.405422252
198	5		2.536744432	1.151333334	2.010518716	1.405422252
198	6	1.124603137	1.978414437	-0.664436658	3.211879403	1.337499576
199	1	-0.163125108	0.392457864	-0.060450752	0.070076853	1.337499576
199	2	0.216815528	0.879856082	-0.201728144	-0.428144583	0.896002182
199	3	-0.423378917	0.13719092	-0.548669534	0.72889989	0.963924858
199	4	0.774469965	0.852098184	-0.131255521	0.839593935	0.92996352
199	5	0.36560506	-0.251673278	1.529549115	-0.501938477	1.133731548
199	6	1.35826156	-0.629833506	3.02356963	-0.44658275	0.420543449
200	1	-0.302786224	-1.149813323	0.164350481	-0.568123058	-0.530374017
200	2	-0.933935679	-1.048790216	0.110761948	-0.461354277	-0.088876622
200	3	-0.411738265	-0.483605663	-0.125308532	-0.630807773	-0.224721974
200	4	-1.440546073	-1.078572749	-0.515710037	-0.602379895	-0.496412679
200	5	1.882001641	-0.020322212	-0.361529791	-0.630125068	0.284698097
200	6		-0.320936809	-0.621048348	-0.518317302	-0.394528664
201	1	-0.625305128	1.066047451	-0.349480908	0.101986848	1.405422252
201	2	-0.046842854	1.568157704	-0.129615046	1.431598276	1.575228943
201	3	-0.4977731	0.409654285	-0.387389152	3.422660354	1.337499576
201	4	0.180888057	0.420229966	0.456733739	3.063655268	1.473344928
201	5	0.843340356	-0.497533704	2.025957328	2.933462175	1.541267605
201	6	-0.150964582	-1.501996641	1.656837888	3.498817612	1.405422252
202	1		-0.617810138	-0.927541221	-0.536213062	0.080930068
202	2	-1.225335062	-0.140906486	-0.706519831	-0.428144583	1.167692886
202	3		-0.616598425	-0.588989629	-0.553843188	0.92996352
202	4	-0.521883759	-0.58520427	-0.606169923	-0.602379895	1.09977021
202	5	-0.045114584	-0.490825291	-0.692468599	-0.630125068	1.609190281
202	6		-0.650910892	-0.664436658	-0.518317302	0.760156829
203	1	-1.382741364	-0.175844954	0.421266176	1.633666634	-0.700180707
203	2	-0.378030429	0.007964542	0.375176641	0.119815366	0.522427463
203	3	0.913963759	0.953177057	0.318212518	-0.630807773	0.828079505
203	4	-1.019105409	0.214752911	0.117509166	1.646121671	1.371460914
203	5	1.265880559	-0.581132885	0.654925121	0.856839393	1.031847534
203	6		0.175357133	1.504978806	0.342497322	-0.632258031
204	1	-1.636776459	-0.607834538	-0.702739988	-0.568123058	-0.632258031
204	2	-0.931420118	0.650781249	-0.394029739	-0.394934889	-0.054915284
204	3	-0.40634036	1.070443914	-0.105148484	-0.528188326	-0.394528664
204	4	0.603671267	-0.251975644	-0.493095065	-0.577939661	-1.107716763
204	5	-1.02517921	1.291415656	-0.290614332	-0.630125068	-1.005832749
204	6		0.031242842	-0.555965884	-0.518317302	-1.005832749
205	1	0.070262385	1.303923388	-0.702739988	0.708276764	-1.039794087
205	2	-0.228055502	0.99333654	-0.706519831	-0.179071879	-0.734142045
205	3		-1.525063155	-0.588989629	-0.579498049	0.114891406
205	4		-0.029814786	0.705498426	0.008625965	0.590350139
205	5		0.424072809	1.340441224	3.369296586	1.167692886
205	6		-0.709159268	-0.360718493	-0.44658275	1.507306266
206	1	-0.794570887	0.118659392	-0.766968912	-0.568123058	-0.190760636
206	2	1.498774198	-0.286436305	0.615553635	-0.428144583	0.997886196
206	3		0.93253558	-0.528509486	-0.605152911	0.997886196
206	4	-0.06534341	1.774456313	-0.56093998	-0.382417786	0.794118167
206	5	-0.289824127	0.050524768	-0.574276168	-0.271202612	1.235615562
206	6		0.176870021	-0.512577575	0.485966426	0.522427463
207	1	0.4886202	0.723220482	-0.927541221	0.006256862	-0.564335355
207	2	-0.541981918	-0.098860589	-0.706519831	-0.44474943	-1.34544613
207	3	0.469346036	0.312599095	-0.588989629	-0.579498049	-1.68505951
207	4	0.239186647	-0.600164998	-0.606169923	-0.602379895	-1.68505951
207	5	-0.526913062	-0.402375487	-0.692468599	-0.60448775	-1.34544613
207	6	-0.731026634	-0.141553624	-0.664436658	-0.518317302	-1.68505951
208	1	1.799367771	-0.445359786	0.517609561	1.37838667	-1.651098172
208	2	1.618595906	1.090854569	0.759779831	0.236049295	-0.768103383
208	3	1.880098273	0.125230372	0.29805247	-0.630807773	-1.34544613
208	4	-0.603825259	-2.227060903	-0.086025578	-0.602379895	-0.971871411
208	5	0.654656201	-1.268290159	0.229432367	-0.630125068	-0.156799298
208	6	1.761429696	-1.311358421	-0.122082792	-0.518317302	0.997886196
209	1	1.75346319	-0.011232828	-0.927541221	0.038166857	-0.020953946
209	2	2.182036202	0.718504915	-0.706519831	-0.44474943	0.692234153
209	3	2.335725085	-0.388996802	-0.588989629	-0.579498049	0.658272815
209	4	3.067350295	-1.70288903	-0.606169923	-0.602379895	0.182814083
209	5	0.28281289	-1.987856475	-0.692468599	-0.630125068	0.182814083
209	6	-0.046337783	-0.460059478	-0.664436658	-0.518317302	-0.428490002
210	1	0.944716765	0.433281999	0.132236019	-0.536213062	-0.598296693
210	2	1.368352816	0.526838882	-0.36999204	-0.44474943	0.352620773
210	3	-0.477815522	1.038754745	-0.588989629	-0.579498049	0.794118167
210	4	-0.300468762	1.010331748	0.140124137	-0.577939661	0.760156829
210	5		0.256728934	-0.668830113	-0.60448775	1.371460914
210	6		0.757266791	-0.53427173	-0.518317302	0.013007392
211	1		-0.951323796	-0.606396603	-0.568123058	-1.719020848
211	2			-0.706519831	-0.461354277	-1.617136834
211	3			-0.588989629	-0.630807773	-1.617136834
211	4			-0.606169923	-0.602379895	-1.549214158
211	5			-0.692468599	-0.630125068	-1.51525282
211	6			-0.664436658	-0.518317302	-1.243562116
212	1	-0.387641125	0.761909279	-0.413709832	0.740186759	0.352620773
212	2	0.572502598	0.87251685	-0.562293635	0.219444448	0.250736759
212	3		0.898204038	-0.4075492	0.446696413	-0.020953946
212	4	1.420140716	0.979401269	-0.470480094	0.155267372	1.337499576
212	5	1.97797374	1.112677189	-0.125144928	-0.117378702	1.303538238
212	6		0.398196299	-0.599354194	-0.518317302	-0.700180707
213	1	-0.66089188	2.230739664	-0.542167679	-0.568123058	-1.209600778
213	2	0.366021346	0.61102411	0.952081427	-0.22888642	-0.394528664
213	3	-0.427622723	1.584994921	-0.528509486	-0.630807773	-1.413368806
213	4	0.012248319	0.734925045	-0.538325009	-0.553499427	-0.428490002
213	5		0.473203012	0.087601449	-0.630125068	-0.564335355
213	6		0.133390559	-0.664436658	-0.231379094	-1.107716763
214	1	-0.647799225	0.450277187	-0.927541221	0.421086804	-0.360567326
214	2	-1.070898178	-0.439712394	-0.706519831	-0.278700961	-0.700180707
214	3	-1.531309544	0.139996145	-0.588989629	1.011103367	-0.258683312
214	4	-0.887413183	0.048398912	-0.606169923	-0.284656848	-0.598296693
214	5	-0.203396963	-0.505934593	-0.692468599	0.138994481	-0.598296693
214	6	-0.531211713	-0.86348485	-0.664436658	0.485966426	-0.190760636
215	1	-0.356710882	-0.709537229	-0.927541221	1.474116657	0.318659435
215	2	0.866649607	-1.308147743	-0.706519831	1.215735265	-0.903948735
215	3	-0.595150927	-2.246534018	-0.588989629	0.215802659	-0.632258031
215	4	-0.179639084	-2.493232323	-0.606169923	0.717392763	-0.903948735
215	5	0.451168573	-2.444319182	-0.692468599	-0.219927976	-0.394528664
215	6		-2.474130764	-0.664436658	-0.303113646	-1.209600778
216	1	0.642894692	0.024187001	-0.927541221	0.51681679	-0.326605988
216	2	-0.884391401	-0.609678489	-0.706519831	0.31907353	-0.12283796
216	3	-0.235925831	-0.359640814	-0.588989629	2.601704784	0.352620773
216	4	0.52056019	-0.423791044	-0.606169923	1.572800968	0.250736759
216	5	-0.808326361	-0.886152015	-0.692468599	1.190124531	0.04696873
216	6		-0.356144457	-0.664436658	0.557700978	-0.564335355
217	1	-1.072202064	-0.994010787	-0.285251984	1.314566679	-0.088876622
217	2	-0.66680982	-1.250616733	-0.610369033	-0.195676726	-0.29264465
217	3	-0.416147649	-1.313276742	-0.568829582	-0.451223742	0.454504787
217	4	-0.167916767	-2.092653021	-0.606169923	-0.18689591	0.522427463
217	5	0.877839441	-1.092521074	0.063962963	3.16419804	0.250736759
217	6	0.711977081	-1.609756953	1.461590496	0.62943553	-0.12283796
218	1		-0.38196366	-0.927541221	-0.536213062	1.677112957
218	2		0.874048049	-0.706519831	-0.461354277	1.2695769
218	3	0.91760966	0.286809077	-0.588989629	-0.579498049	1.507306266
218	4	0.86029887	0.313293916	-0.606169923	-0.015814269	1.167692886
218	5	1.244232937	-0.065629897	-0.692468599	0.087719844	1.575228943
218	6	1.286905875	-0.131120731	-0.664436658	0.701170082	1.711074295
219	1	-0.66089188	-0.421079607	-0.349480908	-0.568123058	-1.311484792
219	2	-0.998653268	-1.433829828	-0.634406733	-0.361725195	-1.379407468
219	3	-0.616620811	-1.271097164	-0.266428866	-0.630807773	-0.190760636
219	4	-0.416285614	-1.640500523	-0.425250151	-0.602379895	-0.29264465
219	5	0.164935058	-1.001874265	-0.668830113	-0.630125068	-0.496412679
219	6	-0.07925854	-0.232954695	-0.642742503	-0.518317302	-1.277523454
220	1	-1.051896148	-0.816042983	0.003778172	1.123106706	-0.258683312
220	2	-0.512709591	-1.969659458	1.072269923	1.248944959	-0.564335355
220	3	-1.593967971	-2.006035051	-0.185788675	0.72889989	0.556388801
220	4	-1.210368722	-1.283181545	0.660268482	0.64407206	0.352620773
220	5	-0.050261528	-1.241975334	-0.337891304	0.29281839	0.386582111
220	6	0.093980968	-1.492497898	1.635143733	-0.231379094	0.794118167
221	1	0.879642899	0.912930401	-0.686451552	-0.011306593	-0.991008978
221	2	0.971330083	1.310512258	-0.823790019	0.694075286	-0.495000891
221	3	1.136717437	1.615675014	-0.677858873	-0.084387718	-0.48700076
221	4	2.461695025	1.188895563	-0.734385465	-0.568779401	-0.567002065
221	5	1.376492776	1.956252776	-0.746030645	-0.628490352	-0.887007282
221	6	0.557976922	1.36015463	-0.690020429	-0.526060336	-0.711004413
222	1	0.813302341	1.821217092	-0.906197247	-0.504404211	0.96102285
222	2	0.753643807	1.992068913	-0.823790019	1.644833269	0.78501998
222	3	-0.045499282	0.783626583	-0.677858873	1.535287896	0.377013327
222	4	2.016351036	1.047509477	-0.734385465	0.339750465	1.113025328
222	5	1.013890103	1.511830391	-0.746030645	1.045119525	0.857021154
222	6	1.324739162	-0.343925021	-0.690020429	1.687190139	0.665018023
223	1		0.04423549	0.000253748	-0.504404211	-0.030993325
223	2		-0.27132311	-0.268137588	-0.522894934	0.929022328
223	3		0.209085457	0.239607838	-0.424519597	0.617017241
223	4	-0.570804118	-0.709120416	-0.530562754	-0.062099283	0.913022067
223	5	-0.491328051	0.079428883	0.599144788	-0.444577179	0.537015936
223	6	-0.020590071	-0.606977821	0.376064311	0.15146532	1.569032763
224	1	-0.819106454	0.242390241	-0.906197247	1.820198842	0.193010327
224	2	0.419960129	1.858571305	-0.823790019	2.17725774	1.065024545
224	3	0.599605481	0.503378505	-0.677858873	3.900014292	1.433030546
224	4	-0.120585838	1.448794881	-0.734385465	4.428134861	1.281028067
224	5	1.409514492	1.038859989	-0.746030645	3.031381796	1.113025328
224	6	1.384981382	1.628247968	-0.690020429	3.426172655	1.433030546
225	1	-0.118440821	0.681560069	-0.52164228	0.834003608	0.841020893
225	2	-0.17179598	1.894827468	-0.629311668	0.40884789	0.281011762
225	3	0.548460383	0.045029697	-0.6268885	0.239547405	0.073008371
225	4	0.134521973	1.544342107	-0.708907626	-0.009684099	0.081008501
225	5	-0.121393513	0.596527968	-0.725012279	0.327858149	0.073008371
225	6	0.198205439	1.551129349	-0.638435684	0.061128566	0.321012414
226	1	-0.591763846	-1.059118641	-0.768856187	-0.504404211	-0.390999195
226	2	-1.128314864	-1.100845004	-0.796007398	-0.522894934	-1.343014718
226	3	0.091061862	-0.773713244	-0.677858873	-0.602683914	-1.359014978
226	4	-1.356990458	0.847572634	-0.734385465	-0.603722857	-1.135011326
226	5	-1.048816237	1.527157237	-0.746030645	-0.518142448	-1.191012239
226	6	-0.945821498	2.233177478	-0.690020429	-0.480891959	-1.015009369
227	1	-0.796948907	0.828504854	-0.549110492	-0.328297919	0.849021023
227	2	-0.130679002	0.486357282	-0.684876912	1.302560395	0.121009153
227	3	1.264302693	-0.301546849	-0.652373687	2.474699752	1.225027154
227	4	1.401520637	0.890326595	-0.734385465	1.003676136	0.257011371
227	5	0.206351562	0.448117126	-0.746030645	1.081902159	-0.054993717
227	6	0.94504129	-0.191446147	-0.690020429	-0.006624	0.05700811
228	1	-0.995855721	-0.382007389	-0.906197247	0.34090599	1.593033154
228	2	-0.659406465	0.759269399	-0.823790019	1.321575555	1.665034328
228	3	0.312527592	0.485616715	-0.677858873	2.766241362	1.313028589
228	4	-0.092144808	0.835988133	-0.734385465	2.156810196	1.409030154
228	5	0.375769086	0.562915337	-0.746030645	2.553207545	0.849021023
228	6	-0.396450067	1.633752071	-0.690020429	1.461348254	1.033024024
229	1		-0.82675102	-0.65898334	-0.469182952	-1.143011457
229	2		-0.047272374	-0.796007398	-0.560925253	-0.719004543
229	3	1.129192193	0.624152117	-0.677858873	-0.602683914	-0.6550035
229	4	-0.307821521	0.959127205	-0.657951948	-0.603722857	-0.511001152
229	5	0.097534217	1.23223249	-0.746030645	-0.628490352	-0.166995543
229	6	0.664111948	1.418980044	-0.672825514	-0.548644524	-0.511001152
230	1		-0.624528286	-0.906197247	-0.504404211	-0.078994108
230	2	-0.76521755	-0.736574886	-0.823790019	-0.541910093	-0.631003108
230	3	0.23239846	0.15868778	-0.677858873	-0.602683914	-0.719004543
230	4	-1.144608853	0.242461394	-0.734385465	-0.551307673	-1.0230095
230	5	0.474434465	1.086114791	-0.746030645	-0.610099035	-1.271013544
230	6	0.498777353	1.300497862	-0.690020429	-0.548644524	-1.327014457
231	1	-0.84934655	-0.489494784	-0.38430122	-0.257855402	0.585016719
231	2	1.100610009	0.248278886	-0.462615939	-0.180622059	-0.286997499
231	3	-0.719697445	-0.823513276	-0.575918128	1.016991699	0.313012284
231	4	0.417972393	-0.210598941	-0.326740044	1.92967773	0.761019589
231	5	-0.267199053	-0.477197243	0.325906028	0.971554255	-0.246996847
231	6	0.287531004	-0.152214064	-0.363317041	-0.390555205	0.169009936
232	1		-0.198127647	-0.906197247	-0.328297919	0.721018936
232	2	-0.76521755	-0.644243113	-0.823790019	-0.541910093	0.60901711
232	3	-1.752821057	-0.089454958	-0.677858873	-0.554093646	-0.246996847
232	4	-0.636155424	1.200846369	-0.734385465	-0.376590391	0.025007588
232	5	-1.681342897	1.132069837	-0.746030645	-0.518142448	-0.278997369
232	6	-0.319116001	0.292912489	-0.690020429	-0.435723582	0.41701398
233	1	-1.861597877	0.462580646	0.16506302	-0.469182952	0.185010197
233	2	-0.520238905	0.588055509	0.287514844	-0.560925253	0.041007849
233	3	-0.501334403	-0.11205059	1.284500482	-0.181568255	0.817020502
233	4	-0.400932098	-0.148965928	0.284728088	0.042731086	1.009023632
233	5	-0.845155497	0.341501285	0.199795831	-0.628490352	0.673018154
233	6	-1.563201216	-0.102504601	0.393259226	-0.277634262	0.729019067
234	1		0.328101324	-0.713919764	-0.469182952	-0.615002847
234	2	0.755587449	1.057824294	-0.796007398	-0.503879774	-0.703004282
234	3	-1.187749677	-0.406326602	-0.575918128	-0.61888067	0.209010588
234	4	-0.322159609	0.190980466	-0.734385465	-0.586251129	-0.927007935
234	5		0.589212875	-0.640938814	-0.628490352	-1.007009239
234	6	-0.518626973	0.674830004	0.633988038	-0.503476147	-0.551001804
235	1		0.27931912	-0.906197247	-0.222634144	0.401013719
235	2	0.943193936	1.226466903	-0.823790019	-0.465849455	-0.711004413
235	3	-0.567498733	0.123369589	-0.677858873	-0.359732572	-0.198996064
235	4	-0.610297493	0.510047467	-0.734385465	-0.603722857	-0.871007022
235	5	0.038858202	0.530294688	-0.746030645	-0.628490352	-0.374998934
235	6	0.222036182	0.527023919	-0.690020429	-0.526060336	-1.359014978
236	1		2.282325905	0.604554411	1.64409255	1.441030676
236	2	1.080298706	1.712556428	1.398819707	3.755515993	0.921022197
236	3	0.959944705	2.33966296	-0.040729212	3.592275925	0.769019719
236	4	0.733014433	0.606108807	0.641417831	1.440469341	0.665018023
236	5	1.36720531	0.575672068	2.679963036	0.199118928	0.841020893
236	6	2.051218385	1.558839274	3.625903277	-0.367971016	1.001023502
237	1	0.682785326	-1.597530086	0.961641167	2.172411426	-1.671020066
237	2	1.084719654	-1.488727781	3.871473027	0.180665974	-1.399015631
237	3	-0.178868144	-1.535172228	-0.499462568	-0.343535816	-1.423016022
237	4	-0.104651054	-0.821646431	-0.19935085	-0.411533847	-1.303014065
237	5	0.539767209	-0.385509021	1.082567209	-0.462968496	-1.399015631
237	6	-0.299293257	0.404000087	-0.621240769	-0.526060336	-1.415015892
238	1	1.061771188	1.068657652	-0.906197247	-0.469182952	0.593016849
238	2		0.106799238	-0.823790019	-0.560925253	1.201026763
238	3		0.516321119	-0.677858873	-0.61888067	0.273011632
238	4	1.005644306	0.145105492	-0.734385465	-0.568779401	-0.318998021
238	5	0.232855591	0.710363515	-0.746030645	-0.628490352	-0.158995412
238	6	0.600242728	1.355107813	-0.690020429	-0.548644524	-0.29499763
239	1	-1.524318685	0.709965646	-0.713919764	-0.469182952	0.081008501
239	2	-1.265173923	-1.466756768	-0.573746425	-0.484864614	-1.487017066
239	3	0.016670973	-1.163677161	-0.677858873	-0.586487158	-1.695020457
239	4	-1.049849516	0.3621609	-0.683429787	-0.586251129	-1.183012109
239	5	0.329124061	0.429355393	-0.746030645	-0.628490352	-1.591018761
239	6	0.009528618	0.895172904	-0.690020429	-0.548644524	-1.55901824
240	1		0.141357202	-0.38430122	-0.433961694	1.489031459
240	2		-0.836783709	-0.629311668	-0.560925253	1.081024806
240	3	0.348748614	-0.357072653	-0.601403314	-0.602683914	1.449030807
240	4	-0.914949467	-0.199990815	-0.734385465	-0.533835944	1.361029372
240	5	-0.93587759	0.486001364	-0.472791885	-0.407794544	0.993023371
240	6	0.428066845	0.362536509	-0.604045854	-0.526060336	0.841020893
241	1	-0.875532208	1.286017631	-0.301896584	-0.046527852	0.305012153
241	2	-0.928158087	1.152518063	-0.712659533	-0.1616069	1.14502585
241	3	-0.409968235	1.328024996	0.112181906	0.693056577	1.425030415
241	4	-0.104651054	0.109731765	0.055427538	0.409637378	1.585033024
241	5	-1.001130824	0.586504521	-0.55686535	1.523293775	1.433030546
241	6	-1.264080374	0.091598396	-0.449291617	-0.277634262	1.529032111
242	1	-0.928622594	0.968284651	-0.38430122	-0.152191627	-1.03100963
242	2	-0.969518379	-0.277618368	-0.601529047	-0.560925253	-0.647003369
242	3	-0.47427698	0.341304038	-0.601403314	1.470500871	0.545016067
242	4	-0.514374134	-0.480298387	-0.708907626	-0.551307673	0.361013066
242	5	-0.592050936	0.3053929	-0.66195718	0.401423418	0.209010588
242	6	-0.337547928	0.197309629	-0.569656023	-0.503476147	-0.11099463
243	1		-0.295134124	-0.52164228	-0.433961694	-0.471000499
243	2		-0.720199884	-0.573746425	-0.560925253	-0.679003891
243	3		-0.684032057	-0.448492195	-0.586487158	0.225010849
243	4		-1.908767857	0.157338894	-0.586251129	0.369013197
243	5	-0.261810832	-1.419800989	-0.325663322	-0.518142448	-0.48700076
243	6	-2.020409162	-0.709476798	0.204115159	-0.074376565	0.401013719
244	1	-0.156992652	0.99362141	-0.329364796	-0.257855402	0.569016458
244	2	0.464472792	1.88578329	-0.684876912	0.009529537	0.441014371
244	3	-0.831114076	0.224571589	-0.601403314	0.077579843	0.017007457
244	4	-0.912074046	1.285738708	-0.606996271	-0.271760022	-0.166995543
244	5	-0.430517914	0.803661939	-0.598902082	0.125553658	-0.543001673
244	6	-0.337547928	1.972365688	-0.586850938	-0.051792377	-0.599002587
245	1	0.036867967	0.014143277	-0.38430122	-0.011306593	0.113009023
245	2	0.152736392	0.746434106	0.009688628	0.694075286	-1.303014065
245	3	1.884816272	-0.392750911	-0.652373687	0.126170112	-1.119011065
245	4	0.850162381	-0.039777272	-0.556040593	-0.09704274	-0.895007413
245	5	0.068834885	-0.259548404	-0.746030645	0.916380303	-0.919007804
245	6	1.461292808	0.51717072	-0.690020429	-0.142129131	-0.246996847
246	1	1.240277769	-0.333638679	-0.466705856	6.539847465	1.673034459
246	2	0.024011972	-0.132760701	-0.629311668	5.904229037	1.705034981
246	3	0.633654711	-0.333229899	-0.448492195	4.402113732	1.721035242
246	4	1.640206642	-0.117801548	-0.479607077	4.498021774	1.705034981
246	5	1.925277354	0.566051413	-0.640938814	5.440644366	1.69703485
246	6	0.876708642	-0.525354258	-0.466486532	3.313251712	1.729035372
247	1	0.381120822	-0.250508686	-0.686451552	0.164799699	-0.142995151
247	2	-0.196560784	0.29245823	-0.573746425	-0.446834295	-0.270997238
247	3	0.158515185	-0.072290132	-0.473977382	-0.392126085	-1.03100963
247	4	-0.198901434	-0.428897608	-0.428651399	-0.306703478	-0.382999065
247	5	-0.270563632	0.187064805	-0.640938814	0.989945573	1.401030024
247	6	-0.017519628	0.279020371	-0.569656023	0.783822598	1.633033807
248	1	-0.154107066	-0.067721469	-0.713919764	-0.328297919	-0.863006891
248	2	0.144953697	0.716384021	-0.740442155	-0.465849455	0.097008762
248	3	1.097844646	-0.010728275	-0.601403314	-0.375929328	-0.054993717
248	4	0.508978789	-0.713504984	-0.352217883	-0.306703478	-0.054993717
248	5	0.675968709	0.198769544	-0.640938814	1.707206948	0.921022197
248	6	0.136970794	0.098430836	-0.655630599	0.219217885	1.32902885
249	1	-1.064712051	0.073016865	-0.439237644	-0.504404211	-0.759005195
249	2	-0.035853106	-0.199365945	0.537558438	-0.522894934	0.033007718
249	3	0.564819528	0.626876663	-0.6268885	-0.505503377	-0.823006239
249	4	0.636901167	0.727161859	-0.708907626	-0.586251129	-0.999009109
249	5	0.13031827	0.774759126	-0.746030645	-0.628490352	-0.975008717
249	6	1.07816114	1.750528505	-0.690020429	-0.548644524	-1.551018109
250	1		0.200349338	-0.906197247	-0.504404211	0.049007979
250	2	-0.81203532	0.335579405	-0.823790019	-0.541910093	-0.471000499
250	3	-1.067217793	0.576541564	-0.677858873	-0.61888067	-1.599018892
250	4	-0.684996057	0.54218229	-0.734385465	-0.603722857	-0.022993195
250	5	-0.306627551	0.270043756	-0.746030645	-0.610099035	-0.647003369
250	6	-1.302059052	1.282081896	-0.690020429	-0.548644524	0.24101111
251	1		0.967054956	0.247467656	1.150994933	-0.262997108
251	2	1.275781046	1.310081965	1.065428248	1.397636194	0.97702311
251	3	0.05348622	0.882664918	-0.473977382	-0.149174742	0.121009153
251	4	1.786802895	1.296456901	-0.326740044	-0.149457924	0.401013719
251	5	0.972039259	1.015813306	1.523952898	0.953162938	1.14502585
251	6	1.415324966	0.475445803	3.608708362	0.625733279	0.833020763
252	1	-0.738314544	1.293861431	0.30240408	1.855420101	0.42501411
252	2	1.153142568	0.311790801	0.204166979	0.827181403	1.017023763
252	3	-0.587724752	0.00656495	-0.372036636	-0.068190962	0.665018023
252	4	0.388678651	0.935187635	-0.224828688	-0.09704274	0.497015284
252	5	-0.284228397	-0.054316466	-0.472791885	-0.389403227	0.185010197
252	6	0.022275266	0.05797978	-0.518071278	-0.548644524	0.049007979
253	1	-1.140257309	1.276209447	3.900739849	0.094357182	1.51303185
253	2	0.659385364	1.308403809	2.398994084	-0.275697858	1.657034198
253	3	0.783243454	2.181575382	3.603652447	1.51909114	1.185026502
253	4	0.28613988	2.516884932	3.291113068	1.667601807	1.385029763
253	5	0.472098292	0.810269708	3.079311992	1.026728207	1.361029372
253	6	1.560232911	0.580538383	2.577013452	1.551685008	0.96102285
254	1	-0.995855721	-0.173365921	1.236323287	1.327101225	-0.174995673
254	2	1.376285019	0.100891303	0.315297465	0.560969168	0.689018415
254	3	0.319950158	-1.057453257	0.01024116	1.049385212	1.241027415
254	4	-0.104651054	-0.78187519	1.609575706	0.409637378	0.481015023
254	5	0.99167624	-0.763215775	1.692099827	0.327858149	1.15302598
254	6	0.90522385	-1.306057953	1.287394815	-0.187297508	1.457030937
255	1	-0.669701557	-1.079696378	-0.219491948	5.201439647	1.649034068
255	2	-0.482136961	-1.36921164	1.482167571	2.481500295	0.833020763
255	3	-1.202466374	-2.216259378	0.316063398	1.567681408	1.345029111
255	4	1.867171938	-0.563206024	0.615939992	0.304807009	1.185026502
255	5	1.19350359	-0.581294237	0.073685635	0.548553957	0.529015806
255	6	0.337805244	-0.671871258	0.118140583	0.15146532	1.489031459
256	1	1.041338377	-2.514059141	2.994288854	-0.328297919	0.809020371
256	2	2.12194646	-1.261107128	1.371037085	0.846196563	0.553016197
256	3	0.962940472	-1.063084272	1.462896787	1.292336554	1.001023502
256	4	0.80383216	-0.999994736	1.889831933	0.619298116	1.081024806
256	5	1.145670082	0.176463623	2.427742642	0.272684197	0.745019328
256	6	1.95845155	-0.238703301	2.714572773	0.264386262	1.14502585
257	1	0.326455292	-1.955550774	-0.906197247	-0.116970368	0.985023241
257	2	0.278137466	-1.52874118	-0.823790019	0.028544697	1.097025067
257	3	-0.039265382	0.645982005	-0.677858873	0.612072796	1.497031589
257	4	0.01061723	0.103591324	-0.734385465	0.951260952	1.50503172
257	5	0.74005727	-0.388420547	-0.746030645	1.707206948	1.321028719
257	6	-0.796359038	-0.14591663	-0.690020429	2.59055768	1.497031589
258	1		0.74376359	-0.52164228	-0.469182952	0.337012675
258	2	1.112829401	2.206618021	-0.434833317	0.560969168	0.561016327
258	3	1.084817658	0.885626971	-0.423007009	0.693056577	0.361013066
258	4	2.371852549	2.022364492	-0.046483817	0.724128485	0.649017762
258	5	2.208949784	2.246211791	-0.28362659	1.026728207	1.169026241
258	6	2.628478046	3.006336404	-0.088198399	1.032248672	1.201026763
259	1		-1.44357924	-0.027214464	-0.398740436	-1.359014978
259	2	-0.8474582	-2.098437497	-0.434833317	-0.560925253	-1.647019674
259	3	0.091061862	-2.067835946	-0.550432941	-0.61888067	-1.343014718
259	4	0.05446423	-1.030663166	-0.097439494	-0.166929652	-1.103010804
259	5		-0.900321241	-0.619920448	-0.279055323	-1.135011326
259	6		0.183012695	-0.535266193	-0.345386828	-0.871007022
260	1		-0.598661714	-0.906197247	-0.011306593	0.625017371
260	2	0.741056609	0.281962913	-0.823790019	-0.009485622	-0.006992934
260	3	0.048702617	-0.126625593	-0.677858873	0.822630626	-0.102994499
260	4	0.187536507	-0.056976658	-0.734385465	0.96873268	-0.447000108
260	5	0.598286835	0.735925279	-0.746030645	0.934771621	0.801020241
260	6	0.385038739	-0.050063171	-0.690020429	0.061128566	1.273027937
261	1		0.704010031	-0.631515128	-0.504404211	0.329012545
261	2		2.823567452	1.398819707	-0.465849455	1.585033024
261	3	0.8594568	2.349652254	-0.372036636	-0.489306621	0.761019589
261	4	1.814577253	2.821267127	1.915309772	-0.359118663	0.625017371
261	5	0.643790177	1.266273975	0.283869296	-0.242272688	0.953022719
261	6	0.498777353	1.993883496	0.066555838	-0.187297508	0.929022328
262	1	-2.162811961	-0.737640503	-0.356833008	-0.116970368	-1.231012891
262	2		-1.0516573	-0.629311668	-0.541910093	-1.471016805
262	3	-1.690725644	0.60172574	-0.677858873	-0.61888067	-1.407015761
262	4	-0.969905063	-0.317517627	-0.683429787	-0.586251129	-1.079010413
262	5	-0.483531312	1.452455503	-0.725012279	-0.499751131	-0.382999065
262	6	-1.067254478	0.423702337	-0.552461108	-0.548644524	-0.230996586
263	1	1.13226573	0.509343695	-0.082150888	-0.433961694	-1.247013152
263	2	1.901023278	0.500018975	0.343080087	-0.522894934	-0.687004021
263	3	0.553838955	-0.020418495	0.163152279	0.207153893	-0.591002456
263	4	1.705945445	0.009014459	-0.19935085	-0.603722857	-0.543001673
263	5	2.015724983	-0.441080253	-0.472791885	-0.150316102	-0.823006239
263	6	1.749248936	-0.080932563	-0.122588229	0.828990975	0.465014762
264	1		0.668409513	0.412276928	-0.504404211	0.905021936
264	2		1.062248828	0.148601736	-0.294713018	0.937022458
264	3		0.045517323	-0.34655145	-0.61888067	0.897021806
264	4	1.712610069	1.04089222	-0.734385465	-0.586251129	0.377013327
264	5	0.763489513	1.370476977	-0.725012279	-0.610099035	0.913022067
264	6	1.36087792	1.89395355	-0.690020429	-0.548644524	0.993023371
265	1	-0.347069298	0.478447441	-0.192023736	0.023914665	0.121009153
265	2	0.203809147	0.750597063	-0.379268074	-0.389788816	1.129025589
265	3	-1.190589142	-0.426076608	0.188637465	0.17476038	0.641017632
265	4	-0.267728781	-0.363936203	-0.326740044	-0.498892488	-0.559001934
265	5	-0.723106466	0.058671187	-0.28362659	-0.37101191	0.377013327
265	6	-0.507094551	0.704520267	0.513623632	-0.45830777	-0.070993977
266	1	-1.476432056	-0.214909513	-0.274428372	-0.046527852	-0.8390065
266	2	1.284468449	0.39742279	-0.518181182	-0.370773656	-0.12699489
266	3	-0.53252114	0.10245708	0.08669672	-0.132977986	-0.022993195
266	4	-1.027850562	0.153012953	-0.275784366	1.178393418	0.337012675
266	5	-1.365544038	-0.090622247	1.692099827	1.983076708	0.361013066
266	6	-1.090763631	-0.287177851	1.8376321	3.155162393	1.185026502
267	1	-0.341683882	-0.162911037	-0.65898334	-0.433961694	-1.463016674
267	2		0.15513089	-0.796007398	-0.446834295	-1.455016544
267	3	-1.187749677	0.383720411	-0.601403314	-0.197765011	-1.055010022
267	4	-0.145531181	1.040997631	-0.40317356	-0.306703478	-0.671003761
267	5	0.326050833	1.701994901	-0.409736787	0.291075514	-0.342998412
267	6	0.94944428	2.222411448	-0.328927211	0.422475582	0.017007457
268	1		-0.744664559	-0.466705856	-0.504404211	-1.639019544
268	2		-0.180287684	-0.768224776	-0.560925253	-1.439016283
268	3		0.278851137	-0.219125518	-0.61888067	-1.287013805
268	4	-0.367618936	1.221410086	-0.708907626	-0.48142076	-1.007009239
268	5	-0.681774298	0.883201965	-0.178534759	-0.628490352	-1.087010543
268	6	0.182291904	2.438709471	-0.690020429	-0.526060336	-0.430999847
269	1		-0.802801839	-0.082150888	-0.504404211	-0.519001282
269	2	-0.675899324	-1.15682672	-0.768224776	-0.1616069	0.113009023
269	3	-0.716995169	-1.091110971	-0.27009589	-0.456913109	-0.150995282
269	4	-0.458914306	-0.908990821	-0.734385465	-0.09704274	0.585016719
269	5	-0.59609843	-0.316799348	-0.746030645	0.051988389	0.937022458
269	6	-0.666272886	-0.131829101	-0.690020429	1.122585426	1.561032633
270	1	-0.156992652	1.366109193	0.055190172	-0.504404211	1.353029241
270	2	-0.330781148	1.344047598	-0.379268074	-0.465849455	1.305028459
270	3	-0.02024498	0.742761049	-0.372036636	-0.570290402	0.257011371
270	4	-0.278053568	0.833795285	-0.352217883	-0.568779401	1.465031067
270	5	0.311851263	1.397812729	-0.451773519	-0.334229275	1.673034459
270	6	0.513369693	1.152315545	-0.294537381	-0.142129131	1.625033676
271	1		1.644341481	-0.906197247	0.023914665	0.681018284
271	2	0.810087022	1.118183828	-0.823790019	-0.066531101	0.137009414
271	3	0.302032614	-0.03355736	-0.677858873	0.59587604	0.681018284
271	4	0.277553761	0.300232108	-0.734385465	0.916317495	0.033007718
271	5	0.298985607	0.599967107	-0.746030645	-0.315837958	0.001007197
271	6	0.367546229	0.800956611	-0.690020429	0.828990975	0.377013327
272	1	-0.058762736	1.218911127	-0.219491948	-0.29307666	0.641017632
272	2	-0.928158087	0.636326866	-0.740442155	-0.332743337	1.289028198
272	3	-0.015322679	0.093519381	-0.601403314	-0.165371499	0.321012414
272	4	-0.512144984	0.762233698	-0.734385465	0.462052562	-0.326998152
272	5	0.486822247	0.803130613	-0.746030645	0.640510543	0.153009675
272	6	0.632839049	1.119549617	-0.690020429	2.906736319	1.297028328
273	1	-0.499963683	0.278678396	-0.906197247	-0.469182952	-1.151011587
273	2	-1.149291551	-1.114892735	-0.823790019	-0.541910093	-1.551018109
273	3	-0.831114076	-0.071135902	-0.677858873	-0.61888067	-1.351014848
273	4		0.675320727	-0.734385465	-0.586251129	-1.38301537
273	5	-1.795441102	1.160562408	-0.746030645	-0.628490352	-0.959008456
273	6	-0.379742186	1.652897688	-0.690020429	-0.548644524	0.161009805
274	1	0.177593405	0.867119447	-0.906197247	-0.29307666	-1.375015239
274	2	-1.288565409	1.085616792	-0.823790019	-0.180622059	-0.30299776
274	3	1.941702435	0.756883974	-0.677858873	1.486697627	-0.47900063
274	4	0.894038818	0.625695675	-0.734385465	2.69843377	0.145009545
274	5	0.278756106	1.683493513	-0.746030645	2.773903353	-0.022993195
274	6	0.456515937	1.360495835	-0.690020429	2.229210663	0.553016197
275	1	-1.19358855	1.789274942	-0.549110492	-0.363519177	-1.663019935
275	2	-0.139236291	-0.39126349	-0.823790019	-0.560925253	-1.527017718
275	3	0.196323269	-0.746788626	-0.6268885	-0.570290402	-1.335014587
275	4	0.362364485	-1.089804868	-0.734385465	2.31405575	-0.6550035
275	5	0.662942028	-0.344789534	-0.725012279	-0.591707717	-1.255013283
275	6	0.309089233	-0.432191705	-0.672825514	3.923024802	-0.062993847
276	1		0.115912485	-0.137087312	-0.469182952	-0.11099463
276	2	-0.020220784	0.401898478	-0.573746425	-0.522894934	0.41701398
276	3	-0.367194128	0.586740991	0.137667093	0.676859821	0.265011501
276	4	-1.784298461	-0.140379985	-0.173873011	2.611075129	0.43301424
276	5	-0.070644102	-0.184097679	-0.262608224	1.504902458	-0.182995804
276	6	-0.101352765	0.136408271	-0.397706872	3.019657261	1.217027024
277	1	-1.245562822	1.271291147	-0.906197247	-0.398740436	-0.831006369
277	2	-1.409741404	0.64066375	-0.823790019	-0.256682698	-0.447000108
277	3	-0.451343845	-0.202508619	-0.677858873	0.660663064	-0.743004934
277	4	0.191197203	-0.412785208	-0.734385465	1.789903905	-0.11099463
277	5	1.05318411	0.639719426	-0.746030645	0.806032399	-0.607002717
277	6	-0.385503193	0.659671396	-0.690020429	0.648317467	-0.535001543
278	1	-0.276110368	-2.401773961	-0.65898334	-0.504404211	-1.631019413
278	2	-0.494965249	-2.034015257	0.148601736	-0.066531101	-1.063010152
278	3	-1.29537156	-2.324615979	-0.448492195	-0.294945548	-0.975008717
278	4	-0.88208475	-0.263816042	0.131861055	-0.236816565	-0.503001021
278	5	-0.91535696	-0.710600287	-0.66195718	-0.5733164	-1.599018892
278	6	-1.679416357	-1.228699897	-0.208562805	-0.526060336	-0.158995412
279	1	0.417054698	-0.572192194	-0.906197247	-0.504404211	1.049024284
279	2	1.673175494	-0.110919542	-0.823790019	0.694075286	1.089024937
279	3	0.815249828	0.229511615	-0.677858873	-0.489306621	0.96902298
279	4	-0.190433289	0.336808645	-0.734385465	-0.009684099	1.057024415
279	5	-0.57305568	-0.547110679	-0.746030645	0.953162938	0.97702311
279	6		0.856409358	-0.690020429	-0.390555205	-0.198996064
280	1	0.486901154	-0.462797976	-0.1096191	-0.504404211	1.481031328
280	2	0.072361256	0.330625898	-0.379268074	0.922257202	1.537032241
280	3	0.633378225	1.294645545	-0.601403314	0.903614407	1.273027937
280	4	-0.023742565	1.158096541	-0.326740044	0.269863552	1.289028198
280	5	-0.564136231	1.185002919	-0.746030645	1.173858746	1.497031589
280	6	-0.482392559	1.935703609	-0.053808568	1.574269196	1.545032372
281	1		1.132029331	-0.439237644	-0.328297919	-1.623019283
281	2		0.912949191	-0.240354966	-0.465849455	-1.607019022
281	3	-0.432482159	-0.5780904	-0.575918128	-0.61888067	-1.647019674
281	4	-1.071426424	0.274919324	-0.428651399	-0.516364216	-1.415015892
281	5	0.232855591	0.570222461	-0.346681688	-0.389403227	-1.479016935
281	6	-1.164678977	-0.194978129	-0.518071278	-0.413139393	-1.631019413
282	1	0.297152456	-0.944657158	-0.054682676	-0.469182952	1.225027154
282	2	0.076833393	-0.638782192	-0.434833317	-0.180622059	0.841020893
282	3	-1.65646693	-0.780342136	-0.448492195	0.17476038	-0.142995151
282	4	-0.974868553	-0.454623143	-0.683429787	-0.184401381	-0.222996456
282	5	1.022282511	0.093151631	-0.725012279	-0.518142448	0.041007849
282	6	0.31598604	-0.297821616	-0.604045854	-0.526060336	-0.262997108
283	1	0.910830693	-1.186519447	-0.439237644	0.974888641	-1.399015631
283	2	1.268767049	-0.285636634	-0.629311668	0.218696294	-1.479016935
283	3	-0.151920272	-1.376629547	-0.499462568	-0.505503377	-1.183012109
283	4	-1.574287685	-0.345313097	-0.581518432	-0.586251129	-1.279013674
283	5	-1.54033669	-0.330818369	-0.725012279	-0.076750832	-0.983008848
283	6	0.001130757	-0.459537068	-0.621240769	-0.526060336	-1.479016935
284	1		-0.890775379	0.357340504	-0.469182952	-0.198996064
284	2	-1.480713828	-0.345498465	-0.018093994	-0.484864614	-0.238996717
284	3	-1.877027693	-1.076301701	-0.524947755	-0.213961767	-0.342998412
284	4	-1.319941216	-1.1230472	-0.657951948	-0.324175206	0.097008762
284	5	-0.752339076	0.120775204	-0.55686535	-0.462968496	0.289011892
284	6	-1.136010117	-0.556271687	-0.552461108	-0.480891959	0.361013066
285	1	0.486901154	-0.896848845	0.494681564	-0.469182952	-1.263013413
285	2	0.059993614	-1.264780978	0.2319496	-0.066531101	-0.278997369
285	3	-1.017376254	0.2945299	-0.066214399	-0.343535816	-0.607002717
285	4	-0.534992228	0.077519583	-0.224828688	0.234920096	-0.48700076
285	5	-0.383285865	-0.6634423	0.325906028	0.419814735	-0.326998152
285	6	-1.449207628	-0.331726736	0.083750753	0.76123841	0.481015023
286	1	-1.942821052	0.21430468	-0.082150888	-0.504404211	-0.695004152
286	2	-0.498378542	-0.106806764	-0.518181182	-0.484864614	-0.591002456
286	3	-1.437266495	1.502803716	-0.652373687	-0.554093646	-0.29499763
286	4	0.022164854	-0.682473957	-0.556040593	-0.568779401	-0.495000891
286	5	-1.066643174	0.178857032	-0.725012279	-0.02157688	-0.559001934
286	6	-1.58265916	1.143682216	-0.466486532	0.083712754	0.889021676
287	1	-1.32730503	0.374142964	-0.686451552	0.12957844	-0.382999065
287	2	-0.230028321	-1.544754698	-0.629311668	0.44687821	-1.039009761
287	3	-0.587724752	-0.960660186	-0.499462568	-0.311142304	-0.647003369
287	4	-0.694689987	-1.34012755	0.106383216	2.733377227	-0.182995804
287	5	-0.951607746	-0.956584079	0.494052957	0.217510245	-0.238996717
287	6	-0.67421317	-0.687787848	0.633988038	0.44505977	0.585016719
288	1		-1.283435501	0.741895471	-0.152191627	0.913022067
288	2	-0.008139551	-0.199824863	1.037645626	0.275741773	-0.334998282
288	3	-0.749066354	-0.188583685	0.112181906	0.255744161	0.345012806
288	4	-0.729406301	0.279439257	-0.021005978	0.444580834	0.929022328
288	5	-0.367390051	-0.691758455	0.53608969	0.548553957	1.009023632
288	6	-0.259305435	-0.233965312	1.8376321	0.399891393	1.385029763
289	1	-1.448294711	-0.389348852	0.989109379	0.059135923	0.449014501
289	2	-1.02695175	0.421152458	0.343080087	0.047559857	1.113025328
289	3	-2.382870724	0.386634529	-0.168155145	0.190957136	-0.334998282
289	4	-1.169073049	0.718256494	0.641417831	0.112617999	0.393013588
289	5	-1.611135278	-1.356145408	-0.094461294	0.033597072	-0.318998021
289	6	-1.559381015	0.061070213	-0.019418738	-0.255050074	0.129009284
290	1	-2.059749759	-0.887256925	0.796831895	2.242853943	-0.743004934
290	2	-0.81203532	-0.675389036	1.593298058	2.025136463	-0.262997108
290	3	-0.574440098	-0.325085665	3.501711702	1.681058701	0.593016849
290	4	-0.403106404	-0.916742405	2.577733581	2.471301304	0.42501411
290	5	-0.714397106	-0.6798343	1.355805969	2.516424911	0.60901711
290	6	-1.217023446	-0.076004171	1.184225324	2.43246836	1.577032894
291	1	-0.414668853	-0.549537055	-0.906197247	0.411348507	-0.438999978
291	2	1.313509423	0.262080601	-0.823790019	1.321575555	0.481015023
291	3	-0.088012445	0.910139164	-0.677858873	1.09797548	0.081008501
291	4	0.323899305	0.755382345	-0.734385465	0.881374039	-0.463000369
291	5	1.187103834	-1.214217539	-0.746030645	0.824423717	0.049007979
291	6	0.31969355	-0.742393901	-0.690020429	-0.345386828	0.489015154
292	1	-0.115685933	-0.467540476	-0.1096191	2.066747651	0.457014632
292	2	-0.674116641	-0.453166169	-0.518181182	0.142635655	1.177026371
292	3	-0.25229471	-0.14703447	-0.601403314	0.433908479	0.393013588
292	4			-0.734385465	-0.603722857	-1.711020718
292	5	1.425622737	-0.115063805	-0.703993912	0.45659737	0.729019067
292	6	0.165552773	-0.56539742	0.032166008	-0.255050074	-0.222996456
293	1	0.404503533	0.0381272	-0.38430122	-0.398740436	1.377029633
293	2	-0.332484867	0.7174401	0.509775816	2.310363858	0.721018936
293	3	-0.447183164	-0.955869454	-0.499462568	1.632468433	1.033024024
293	4	-0.259380173	1.012317767	0.157338894	2.331527478	1.305028459
293	5	-0.638079992	0.254485183	-0.682975546	2.424468324	1.017023763
293	6	-0.108524425	0.353409088	-0.26014755	0.851575164	0.825020632
294	1	-0.879286947	-1.049300697	0.329872292	-0.469182952	-1.111010935
294	2	-1.780292461	-1.973724048	-0.462615939	-0.560925253	-0.599002587
294	3	-0.569470344	-1.510381182	-0.652373687	-0.61888067	-0.679003891
294	4	-0.555154082	-1.981723864	-0.530562754	-0.603722857	-0.855006761
294	5	-1.200088811	-1.78538436	-0.409736787	-0.628490352	-0.511001152
294	6	-1.289213032	-1.783603215	-0.604045854	-0.548644524	-0.527001413
295	1		1.631812909	1.593410043	-0.046527852	0.689018415
295	2		0.83800243	-0.407050696	0.256726613	0.825020632
295	3		0.630930614	-0.677858873	-0.181568255	1.489031459
295	4	-0.307821521	1.824471714	-0.734385465	-0.429005575	1.201026763
295	5		0.612396714	-0.746030645	-0.02157688	1.713035111
295	6	1.923283952	0.298154105	-0.690020429	-0.051792377	1.193026632
296	1	-0.846385484	-0.174635568	0.219999444	-0.504404211	-0.983008848
296	2	-0.739002937	-0.318856527	1.732211166	-0.389788816	-0.398999325
296	3	0.080827653	1.584887562	1.233530109	-0.602683914	-0.8390065
296	4	0.832813564	0.930867591	0.46307296	-0.376590391	-0.414999586
296	5	-0.654089482	0.381159523	0.241832564	-0.610099035	-0.430999847
296	6	0.125425734	-0.249060922	-0.105393314	-0.480891959	-0.919007804
297	1	-0.837600701	1.029476446	-0.164555524	-0.08174911	-0.038993456
297	2	-1.03672162	0.276029853	-0.351485453	-0.427819135	-0.190995934
297	3	-0.710250586	1.115711565	1.539352346	-0.392126085	0.489015154
297	4	-0.361379209	0.780901699	0.947151897	-0.48142076	0.537015936
297	5	-0.576360386	0.18897295	1.629044729	-0.5733164	0.393013588
297	6	-1.031008008	-0.361799366	0.032166008	-0.548644524	1.169026241
298	1	-0.05864758	0.218816473	-0.604046916	-0.504404211	-0.727004674
298	2	-1.128314864	0.109996372	-0.490398561	-0.560925253	-1.511017457
298	3	-1.752821057	-1.150997163	0.265093025	-0.586487158	-1.511017457
298	4	-1.231518412	-1.168078715	-0.19935085	-0.463949032	-1.351014848
298	5	-0.213107134	-1.718321355	0.073685635	-0.628490352	-1.223012761
298	6	-0.723897873	0.001865364	-0.621240769	-0.548644524	-1.511017457
299	1	-0.4432871	0.904191933	1.785687527	-0.08174911	-0.374998934
299	2	0.907890774	0.500966752	0.481993195	1.492711992	-0.358998673
299	3	1.782690995	2.054246572	0.08669672	0.126170112	0.385013458
299	4	1.717183763	1.397225486	-0.377695721	-0.376590391	0.321012414
299	5	1.140399716	1.340116994	2.65894467	-0.131924784	0.121009153
299	6	1.128596405	1.054090512	0.823132105	0.377307205	0.305012153
300	1	-0.796948907	0.525222597	-0.301896584	-0.398740436	-1.103010804
300	2	-1.071335961	0.020667021	-0.379268074	-0.522894934	-1.271013544
300	3	-0.807895987	0.6075808	-0.550432941	0.304334429	-0.078994108
300	4	-1.239395535	-0.25813598	-0.454129238	-0.201873109	-0.919007804
300	5	-1.203960874	-1.272156421	-0.703993912	-0.352620592	-1.471016805
300	6	-1.261835854	-0.112079245	-0.156978059	-0.548644524	-0.84700663
301	1	1.58063291	0.629670231	1.153918651	-0.504404211	1.041024154
301	2	0.973728345	1.214751642	1.120993491	-0.560925253	-0.29499763
301	3	-0.269805801	0.672484608	0.239607838	-0.586487158	-0.735004804
301	4	1.001100711	0.685132725	-0.148395172	-0.568779401	-0.198996064
301	5	0.762716374	-0.470540865	-0.472791885	-0.628490352	-1.311014196
301	6	-0.844718708	-1.58111372	-0.432096702	-0.548644524	-0.607002717
302	1	-1.149805756	-0.060452584	-0.301896584	-0.504404211	-1.599018892
302	2	-2.494154432	-0.511701811	-0.379268074	-0.560925253	-1.639019544
302	3	-1.174193278	0.764021308	-0.193640331	-0.262552035	-0.430999847
302	4	-1.216189063	-0.137667758	-0.173873011	-0.306703478	-0.951008326
302	5	-1.409659093	-1.078548211	-0.220571491	-0.554925083	0.145009545
302	6	-1.072434058	-0.612737033	-0.569656023	-0.548644524	-0.615002847
303	1	-0.898890227	-1.32317219	-0.082150888	-0.504404211	-0.086994238
303	2	-0.932912896	-1.245989289	0.982080383	-0.541910093	0.06500824
303	3	-0.951076629	-0.754032579	1.309985668	-0.602683914	-0.447000108
303	4	-0.210973015	-2.336947727	0.259250249	-0.586251129	0.017007457
303	5	-1.048816237	-1.415256619	-0.746030645	-0.610099035	-0.66300363
303	6	-0.580415677	-1.346977518	-0.690020429	-0.526060336	-0.951008326
304	1	0.452276498	-1.137593486	-0.411769432	-0.504404211	-0.150995282
304	2	-0.642570219	-0.257928564	-0.184789723	-0.370773656	0.801020241
304	3	-0.151920272	-0.54114093	0.392518957	-0.521700134	0.369013197
304	4	-0.610297493	-0.936995737	-0.19935085	-0.603722857	0.521015675
304	5	-0.100380087	-1.874917711	0.031648902	-0.518142448	-0.030993325
304	6	0.90522385	-1.557971291	-0.105393314	-0.45830777	-0.455000239
305	1	-0.0033077	-1.393789913	0.16506302	-0.504404211	-0.29499763
305	2	-0.714455556	-0.496830456	0.093036493	-0.522894934	0.025007588
305	3	-0.015322679	-0.498390015	0.112181906	-0.586487158	0.009007327
305	4	-0.946395808	-0.998176644	0.055427538	-0.376590391	0.857021154
305	5	0.732407281	-1.19051278	0.683218253	-0.536533766	1.097025067
305	6	0.555865064	-0.547130598	0.616793123	-0.526060336	-0.543001673
306	1		-1.085435015	-0.027214464	-0.469182952	-1.159011717
306	2		-0.861003586	-0.045876615	-0.541910093	-1.215012631
306	3		0.161083029	0.035726347	-0.586487158	-0.575002195
306	4	-0.322159609	-0.791563576	-0.326740044	-0.533835944	-0.455000239
306	5	0.93180347	-1.375950309	0.241832564	-0.591707717	-0.471000499
306	6	-0.518626973	-0.969704027	-0.19136789	-0.548644524	-0.358998673
307	1	1.710269706	-1.722440103	-0.439237644	-0.504404211	-0.623002978
307	2	0.943193936	-0.588907263	-0.407050696	-0.560925253	0.409013849
307	3	0.313239536	-0.840819554	0.621885635	-0.61888067	0.041007849
307	4	-0.008521161	-0.81158129	0.896196219	-0.603722857	0.409013849
307	5	-0.63459608	-1.110649895	1.292750871	-0.628490352	0.217010719
307	6	-1.513413894	-0.484000449	0.496428717	-0.526060336	-0.47900063
308	1	-1.536783649	-1.081670634	-0.274428372	-0.504404211	-1.647019674
308	2	-0.167236452	-0.844842475	-0.434833317	-0.560925253	-1.247013152
308	3	-0.773417915	0.244172365	-0.219125518	0.774040357	-0.855006761
308	4	-0.157678387	-0.827448514	-0.454129238	0.252391824	-1.399015631
308	5	-1.237658002	-0.923047118	-0.430755153	-0.462968496	-1.495017196
308	6	-1.049691625	-0.330442165	0.169725329	-0.548644524	-1.279013674
309	1	0.719088844	-1.282482708	-0.274428372	-0.328297919	-0.318998021
309	2	-0.304616806	-0.764336672	0.287514844	-0.351758497	0.43301424
309	3	-0.163980623	-1.185570611	-0.677858873	-0.61888067	0.193010327
309	4	0.232318966	-0.144903014	-0.683429787	-0.603722857	-0.174995673
309	5	-0.275485048	-0.118477568	-0.493810251	-0.628490352	-0.711004413
309	6	-1.51310533	0.319275375	-0.535266193	-0.548644524	-1.087010543
310	1	-0.0033077	-0.555930768	-0.356833008	0.270463474	-0.543001673
310	2		-0.995719227	-0.490398561	-0.541910093	-0.214996325
310	3	0.404249844	-0.4586085	-0.015244026	-0.100584474	0.673018154
310	4	-0.85845858	-0.480879823	0.106383216	-0.551307673	0.681018284
310	5	-0.567825386	-0.679849763	-0.367700054	0.346249466	-0.12699489
310	6	-0.95945491	-0.632462489	-0.569656023	-0.300218451	-1.047009891
311	1	1.37479169	-0.2022907	-0.164555524	-0.469182952	-0.607002717
311	2		1.025678853	-0.101441858	-0.560925253	-0.310997891
311	3	-0.615328745	-0.482096581	-0.652373687	-0.61888067	-0.262997108
311	4	0.044143969	1.690997566	-0.734385465	-0.603722857	-0.607002717
311	5	1.417849593	0.33244371	-0.703993912	-0.628490352	-0.398999325
311	6	0.775377107	0.30419929	-0.621240769	-0.548644524	0.521015675
312	1	0.589296993	-0.38206628	0.192531232	-0.257855402	1.457030937
312	2	-0.746083192	-0.171502521	-0.351485453	-0.275697858	1.321028719
312	3	0.632572202	0.109287956	-0.219125518	-0.392126085	1.281028067
312	4	0.937249761	-0.438056948	-0.250306527	0.025259358	1.433030546
312	5	1.745880381	0.224356369	1.082567209	-0.150316102	1.417030285
312	6	1.120923777	-0.723090628	2.215920234	0.106296943	1.51303185
313	1	0.481610447	0.63727454	-0.906197247	-0.469182952	1.50503172
313	2	1.986815319	0.005775561	-0.823790019	-0.560925253	1.257027676
313	3	0.881579613	-0.308854669	-0.677858873	-0.586487158	1.233027285
313	4	1.62306865	1.175331378	-0.734385465	-0.586251129	0.313012284
313	5	1.539548534	1.628885908	-0.746030645	-0.610099035	0.505015414
313	6	1.794555164	2.671855304	-0.690020429	-0.526060336	-0.326998152
314	1	0.410880811	1.061457754	0.686959047	-0.433961694	1.665034328
314	2	0.518258405	0.776121061	-0.101441858	-0.541910093	1.345029111
314	3	0.131935	-0.046409582	-0.168155145	-0.554093646	1.673034459
314	4	0.369090707	0.553726967	-0.40317356	-0.201873109	1.52103198
314	5	2.379376817	0.949109433	0.073685635	0.199118928	1.553032502
314	6	0.714749496	1.383286432	-0.346122126	-0.029208188	1.553032502
315	1	-0.541933559	0.889074039	0.329872292	-0.504404211	0.537015936
315	2	-0.096007362	0.88933979	-0.045876615	-0.560925253	0.769019719
315	3	-0.145615622	0.014719288	0.80028194	-0.602683914	1.009023632
315	4	0.972754179	0.727161859	-0.122917333	-0.324175206	0.889021676
315	5	-0.05810787	1.076840796	-0.514828617	-0.554925083	0.945022589
315	6	-0.198290241	0.9434396	-0.242952635	-0.548644524	-0.014993064
316	1	-0.875774651	-1.154472818	-0.768856187	-0.504404211	-1.303014065
316	2	-0.514976349	-0.975645863	-0.768224776	-0.560925253	-1.255013283
316	3	0.261571408	-0.59818813	-0.473977382	-0.61888067	-0.903007543
316	4	0.766460791	-1.748824176	-0.479607077	-0.603722857	-0.975008717
316	5	-0.051220156	-2.126534177	-0.430755153	-0.628490352	-0.999009109
316	6	1.235513514	-1.719801689	-0.500876363	-0.548644524	-1.503017326
317	1	1.13226573	-0.053394798	0.274935868	-0.469182952	-0.999009109
317	2	-2.082637101	0.551586796	-0.462615939	-0.541910093	0.105008892
317	3	-0.889596188	-0.383463814	-0.6268885	-0.602683914	-0.206996195
317	4	-0.790415768	-1.009743419	-0.632474109	-0.603722857	-0.519001282
317	5	-1.50480294	-0.990295327	-0.241589857	-0.591707717	-0.254996978
317	6	-1.442057904	-1.580873212	0.27289482	-0.548644524	-1.143011457
318	1		0.237502269	-0.549110492	-0.504404211	-0.414999586
318	2	-1.319509055	-0.792443361	-0.629311668	-0.560925253	0.329012545
318	3	-1.015083797	-0.111816438	-0.372036636	-0.61888067	-0.559001934
318	4	-0.327710517	-1.074544818	-0.250306527	-0.603722857	-0.551001804
318	5	-0.964502755	-1.038619075	-0.746030645	-0.628490352	-0.222996456
318	6	-1.024374567	-1.1206763	-0.690020429	-0.548644524	-1.423016022
319	1	-2.102016346	-0.091359251	-0.878729035	-0.504404211	-1.687020327
319	2	-1.428391498	-0.558558025	-0.712659533	-0.560925253	-1.407015761
319	3	-0.753615153	-0.536190117	-0.652373687	-0.61888067	-1.079010413
319	4	-0.525083608	-0.178565318	-0.734385465	-0.603722857	-1.295013935
319	5	-1.890037945	-1.094043694	-0.640938814	-0.628490352	-0.927007935
319	6	-0.656705018	-0.637114098	-0.569656023	-0.548644524	-0.887007282
320	1	0.22139812	1.28956966	-0.906197247	-0.363519177	-0.30299776
320	2	-0.19069192	0.999389852	-0.823790019	-0.313728177	0.657017893
320	3	-1.225750577	0.056693411	-0.677858873	-0.570290402	-0.182995804
320	4	0.748601117	-0.342334031	-0.734385465	0.182504911	-0.695004152
320	5	0.053329339	0.233468752	-0.746030645	0.033597072	-0.535001543
320	6	0.719845718	-0.43961573	-0.690020429	-0.142129131	-0.775005456
321	1		0.510367512	0.192531232	-0.328297919	0.353012936
321	2		-0.838863717	0.148601736	-0.427819135	0.889021676
321	3	0.455513417	-0.854666544	-0.066214399	-0.61888067	0.697018545
321	4	-0.768774801	-0.473244278	0.743329186	-0.603722857	1.049024284
321	5	0.607313743	0.06706404	0.031648902	-0.279055323	0.481015023
321	6	0.467504083	-0.480575081	0.221310074	-0.548644524	0.737019197
322	1		0.994293276	-0.411769432	-0.504404211	-1.319014326
322	2		1.082604408	-0.712659533	0.123620495	-0.222996456
322	3		1.476666134	-0.677858873	-0.602683914	-1.56701837
322	4		1.032610012	-0.708907626	-0.603722857	-1.615019153
322	5		1.070869804	-0.746030645	-0.628490352	-0.8390065
322	6	1.765082175	1.461744523	-0.672825514	-0.548644524	-1.639019544
323	1	1.505069231	-0.219474506	1.181386863	-0.504404211	-1.415015892
323	2	-0.384042094	0.040465556	0.454210573	-0.522894934	-1.103010804
323	3	-0.610363733	0.55752071	2.176482007	-0.61888067	-0.583002326
323	4	-1.189105505	-0.152327429	1.354797318	-0.586251129	-0.8390065
323	5	-0.452230706	0.215975342	1.965338587	0.45659737	-0.639003239
323	6	-0.838510039	-0.161738522	0.943496511	-0.45830777	-0.639003239
324	1	-0.928622594	-1.765976446	-0.576578704	-0.504404211	0.137009414
324	2		-1.732334797	-0.518181182	-0.560925253	0.625017371
324	3	0.919954262	-0.654303464	-0.550432941	-0.61888067	-0.086994238
324	4	0.136258785	-0.913378731	-0.479607077	-0.603722857	0.41701398
324	5	0.7928626	-1.010484725	-0.325663322	-0.628490352	0.337012675
324	6	-0.312243618	-0.587141894	-0.500876363	-0.548644524	-0.022993195
325	1	-0.796948907	-0.401422381	-0.356833008	-0.504404211	-0.158995412
325	2	0.134660803	-0.39422324	0.120819114	-0.522894934	0.297012023
325	3	0.540677214	-0.148669607	-0.27009589	0.466301991	1.025023893
325	4	0.287962371	-0.539212647	-0.428651399	1.056091321	0.769019719
325	5	-0.177783245	-0.299793528	-0.220571491	0.309466831	1.393029893
325	6	-0.150343861	0.08623758	0.565208378	0.061128566	0.625017371
326	1	-0.097310829	-0.065249833	-0.906197247	-0.363519177	0.441014371
326	2	-0.739002937	-0.547540404	-0.823790019	-0.427819135	0.673018154
326	3	-0.701905046	0.171182346	-0.677858873	-0.489306621	0.033007718
326	4	0.786033013	0.326135575	-0.734385465	-0.411533847	0.161009805
326	5	0.205890472	0.696965535	-0.746030645	-0.481359814	0.353012936
326	6	0.738726611	0.687994539	-0.690020429	-0.503476147	0.353012936
327	1	-1.613331039	-2.646691489	-0.631515128	1.679313809	1.281028067
327	2	0.462572394	-1.669266924	0.370862708	-0.199637219	0.153009675
327	3	0.466568239	-0.319456319	0.112181906	1.195156017	0.089008631
327	4	0.292305661	-0.114052087	-0.530562754	0.409637378	-0.158995412
327	5	0.12805599	-0.099338585	-0.493810251	-0.02157688	-0.583002326
327	6	0.700675292	-0.65873904	-0.586850938	-0.187297508	-0.342998412
328	1	-2.766143026	-1.730151566	-0.52164228	-0.469182952	-1.679020196
328	2	-0.246865018	-1.180773224	0.287514844	-0.1616069	-1.319014326
328	3	0.185531856	-0.887441858	-0.423007009	1.033188456	-1.247013152
328	4	-0.13200264	-1.03655057	-0.505084915	1.073563049	-0.823006239
328	5	-0.267199053	-0.272947181	-0.66195718	1.229032698	-0.743004934
328	6	0.69860498	-0.902539588	-0.397706872	0.174049508	-0.6550035
329	1	-0.658205004	-2.118167955	-0.906197247	1.961083876	0.009007327
329	2	-0.588224308	-0.572430305	-0.823790019	1.511727152	-0.959008456
329	3	-0.409968235	-0.726511688	-0.677858873	0.757843601	-0.983008848
329	4	0.369090707	-1.200395604	-0.734385465	0.28733528	-0.903007543
329	5	-1.82932356	-1.513389642	-0.746030645	1.21064138	-0.615002847
329	6		-1.08590293	-0.690020429	0.580564902	0.089008631
330	1	-1.111070506	-1.911767973	-0.52164228	1.925862618	-0.559001934
330	2	-1.02695175	-1.066453812	1.009863005	0.579984328	-1.695020457
330	3	-0.611565135	-1.357539937	-0.091699585	6.313330957	0.201010458
330	4	-0.914144909	-1.039050799	1.049063252	1.894734274	0.177010066
330	5	-1.398415045	0.097546934	0.031648902	0.989945573	-0.150995282
330	6	-0.919152045	-0.17914989	0.393259226	0.196633697	-0.519001282
331	1		0.173230241	-0.1096191	-0.433961694	-0.84700663
331	2	-1.198757466	-0.46007183	-0.573746425	-0.560925253	-0.503001021
331	3	-0.307075984	0.838564572	-0.524947755	-0.61888067	-1.415015892
331	4	0.091527808	0.157696733	-0.708907626	-0.603722857	-1.2070125
331	5	-0.016574486	0.58443253	-0.703993912	-0.628490352	-1.5750185
331	6	1.00901987	1.300633175	-0.690020429	-0.548644524	-1.351014848
332	1	0.956572634	0.939369829	0.384808716	-0.504404211	-0.134995021
332	2	2.919085943	-0.791338466	-0.045876615	-0.484864614	-0.463000369
332	3	0.054376884	-0.218654128	0.647370821	-0.489306621	-0.999009109
332	4	-1.382246537	-1.905446828	-0.071961656	-0.429005575	-1.015009369
332	5	-0.964502755	-1.477846859	-0.451773519	-0.628490352	-1.063010152
332	6	-0.517738398	-1.393567459	0.169725329	-0.548644524	-1.519017587
333	1		0.804269805	-0.356833008	-0.469182952	0.617017241
333	2		1.013819456	-0.212572345	0.161650815	-0.47900063
333	3		0.258915604	-0.473977382	-0.262552035	-1.551018109
333	4		-0.16338598	-0.352217883	0.007787629	-1.599018892
333	5	-0.557367584	-0.803411862	-0.514828617	-0.352620592	-1.695020457
333	6		-1.459551325	-0.638435684	0.332138828	-1.695020457
334	1	-0.270844011	0.678205013	-0.906197247	-0.469182952	-0.182995804
[truncated: 92,010 more rows]
